# Supplementary material for: Comparison of photo- and thermally initiated polymerization-induced self-assembly: a lack of end group fidelity drives the formation of higher order morphologies
Source: Royal Society of Chemistry journal article supplement (doi:10.1039/c7py00407a), 2017-01-01
Supplement: c7py00407a1.pdf [file c7py00407a1.pdf]

## Supplementary Information

### Comparison of photo- and thermally initiated polymerization-induced self-assembly; lack of end group fidelity drives the formation of higher order morphologies

Lewis D. Blackman,<sup>a</sup> Kay E. B. Doncom,<sup>a</sup> Matthew I. Gibson<sup>a,b\*</sup> and Rachel K. O'Reilly<sup>a\*</sup>

<sup>a</sup> Dept. of Chemistry, University of Warwick, Gibbet Hill Road, Coventry, CV4 7AL, UK

<sup>b</sup> Warwick Medical School, University of Warwick, Gibbet Hill Road, Coventry, CV4 7AL, UK

#### Contents

|                                                                                                      |    |
|------------------------------------------------------------------------------------------------------|----|
| Supplementary <sup>1</sup> H NMR spectroscopy data.....                                              | 2  |
| Kinetics and conversion data for formulations formed by routes A and B.....                          | 2  |
| Supplementary SEC data for routes A and B.....                                                       | 4  |
| Supplementary TEM data for formulations formed by route A.....                                       | 5  |
| Supplementary TEM data for formulations formed by route B.....                                       | 13 |
| Supplementary DLS data for formulations formed by routes A and B.....                                | 21 |
| Histograms of PEG <sub>113</sub> - <i>b</i> -HPMA <sub>400</sub> unilamellar vesicles.....           | 22 |
| Supplementary data for formulations formed by route C .....                                          | 23 |
| Supplementary data for the post-synthetic irradiation experiments.....                               | 24 |
| Equilibrium structure of PEG <sub>113</sub> - <i>b</i> -HPMA <sub>300</sub> formed by route A+D..... | 29 |

## Supplementary $^1\text{H}$ NMR spectroscopy data

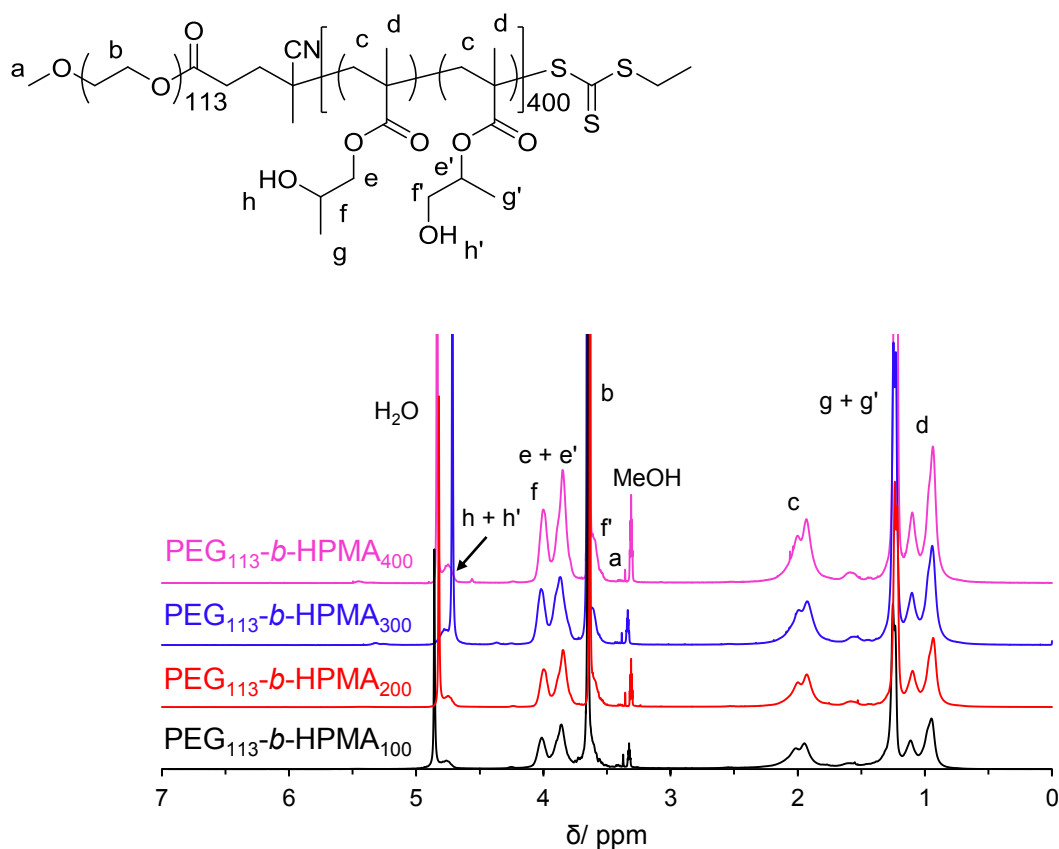

**Fig. S1.** Representative  $^1\text{H}$  NMR spectra of PEG<sub>113</sub>-b-HPMA<sub>x</sub> diblock copolymers formed at 10 wt% HPMA by route B analyzed at 300 MHz in CD<sub>3</sub>OD. The spectral intensities were normalized to the PEG mCTA at 3.63 ppm (signal “b”).

## Kinetics and conversion data for formulations formed by routes A and B

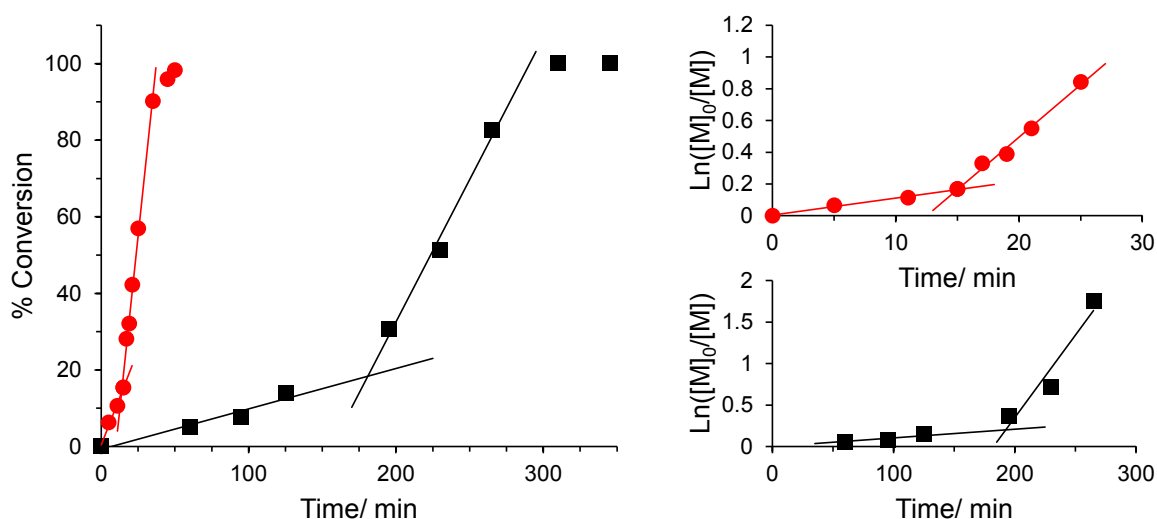

**Fig. S2.** Kinetic plots of formulations formed by routes A (red circles) and B (black squares). In each case an inflection point has been indicated by the intercept of the two gradients, which shows the onset of particle aggregation.

| Method  | PHPMA<br>Target DP | [HPMA]/<br>wt% | Conversion | Method  | PHPMA<br>Target DP | [HPMA]/<br>wt% | Conversion |
|---------|--------------------|----------------|------------|---------|--------------------|----------------|------------|
| Route A | 100                | 10             | >99%       | Route B | 100                | 10             | >99%       |
| Route A | 100                | 15             | >99%       | Route B | 100                | 15             | >99%       |
| Route A | 100                | 20             | >99%       | Route B | 100                | 20             | >99%       |
| Route A | 100                | 25             | >99%       | Route B | 100                | 25             | >99%       |
| Route A | 200                | 10             | >99%       | Route B | 200                | 10             | >99%       |
| Route A | 200                | 15             | >99%       | Route B | 200                | 15             | >99%       |
| Route A | 200                | 20             | >99%       | Route B | 200                | 20             | >99%       |
| Route A | 200                | 25             | >99%       | Route B | 200                | 25             | >99%       |
| Route A | 300                | 10             | >99%       | Route B | 300                | 10             | >99%       |
| Route A | 300                | 15             | >99%       | Route B | 300                | 15             | >99%       |
| Route A | 300                | 20             | 97%        | Route B | 300                | 20             | >99%       |
| Route A | 300                | 25             | 98%        | Route B | 300                | 25             | >99%       |
| Route A | 400                | 10             | >99%       | Route B | 400                | 10             | >99%       |
| Route A | 400                | 15             | >99%       | Route B | 400                | 15             | >99%       |
| Route A | 400                | 20             | 97%        | Route B | 400                | 20             | >99%       |
| Route A | 400                | 25             | 99%        | Route B | 400                | 25             | >99%       |

**Table S1.** Summary of final conversions as assessed by  $^1\text{H}$  NMR spectroscopy for the 100% light intensity photoinitiated (route A) and thermally initiated (route B) PISA formulations.

### Supplementary SEC data for routes A and B

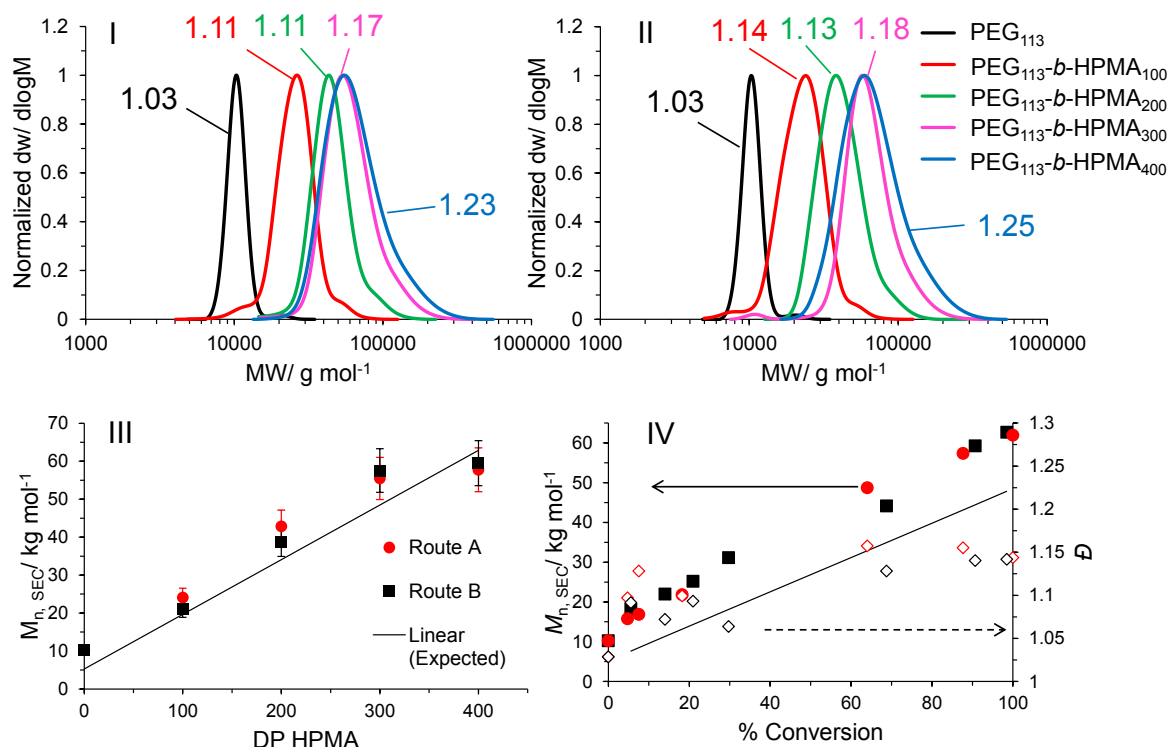

**Fig. S3.** Representative RI SEC traces for PEG<sub>113</sub>-*b*-HPMA<sub>x</sub> diblock copolymers formed at 10 wt% HPMA using 5 mM NH<sub>4</sub>BF<sub>4</sub> in DMF as the eluent. Data for route A (I) and route B (II) are shown along with the *D* values. Key: In each case, PEG<sub>113</sub> (black trace), PEG<sub>113</sub>-*b*-HPMA<sub>100</sub> (red trace), PEG<sub>113</sub>-*b*-HPMA<sub>200</sub> (green trace), PEG<sub>113</sub>-*b*-HPMA<sub>300</sub> (magenta trace) and PEG<sub>113</sub>-*b*-HPMA<sub>400</sub> (blue trace) are shown. Panel III shows the calculated *M<sub>n</sub>* values for route A (red circles) and route B (black squares) derived diblock copolymers shown in panels I and II, using PMMA standards. Error bars represent 10% error. The black linear trend shows the expected *M<sub>n</sub>* values. Panel IV shows SEC data from the kinetic study of PEG<sub>113</sub>-*b*-HPMA<sub>300</sub> formed by routes A (red) and B (black). Left axis: *M<sub>n</sub>* values of polymers formed by route A (red circles) and route B (black squares), the black linear trend shows the expected *M<sub>n</sub>* values. Right axis: *D* values of polymers formed by route A (red diamonds) and route B (black diamonds).



### Supplementary TEM data for formulations formed by route A

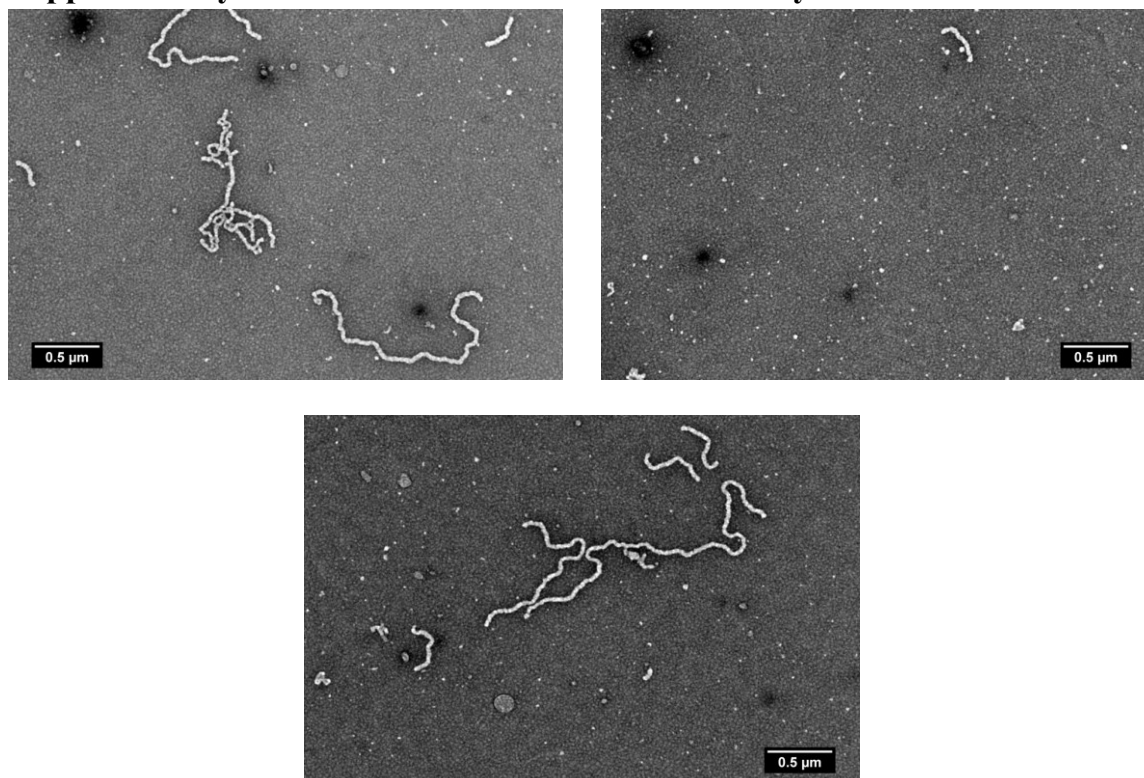

**Figure S4.** Representative TEM images of PEG<sub>113</sub>-*b*-HPMA<sub>100</sub> formed at 10 wt% HPMA (S+W).

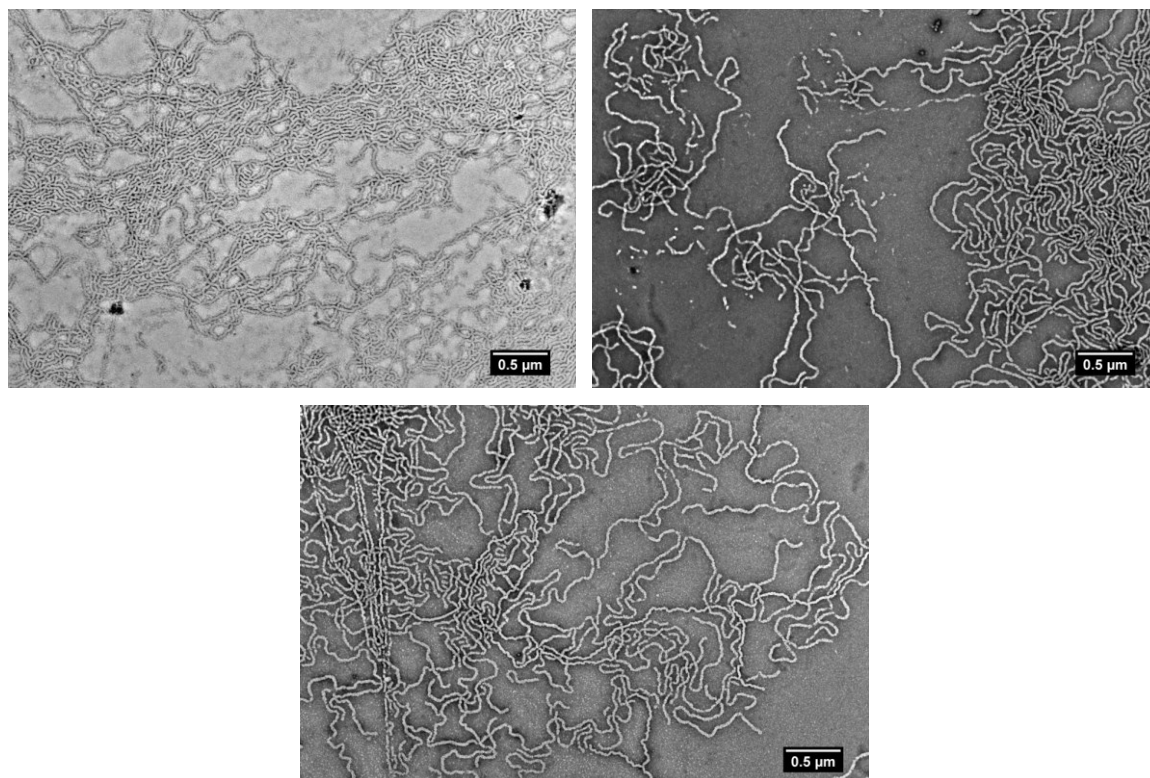

**Figure S5.** Representative TEM images of PEG<sub>113</sub>-*b*-HPMA<sub>100</sub> formed at 15 wt% HPMA (W).

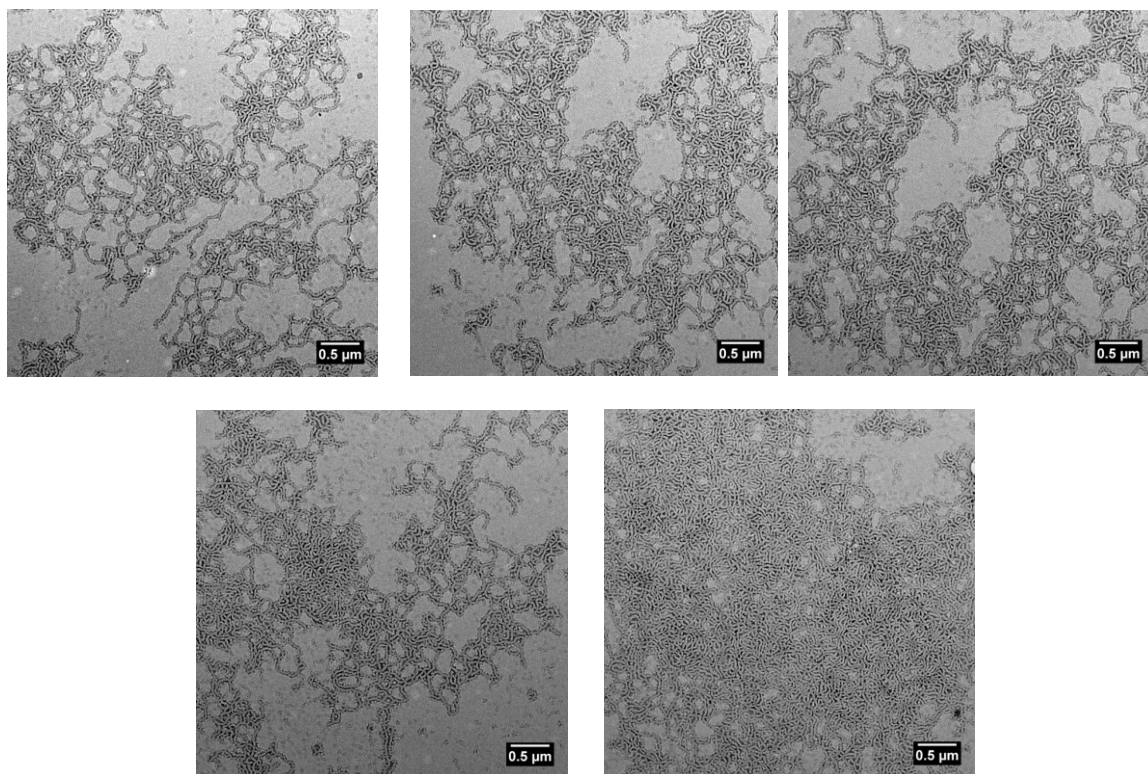

**Figure S6.** Representative TEM images of PEG<sub>113</sub>-*b*-HPMA<sub>100</sub> formed at 20 wt% HPMA (W).

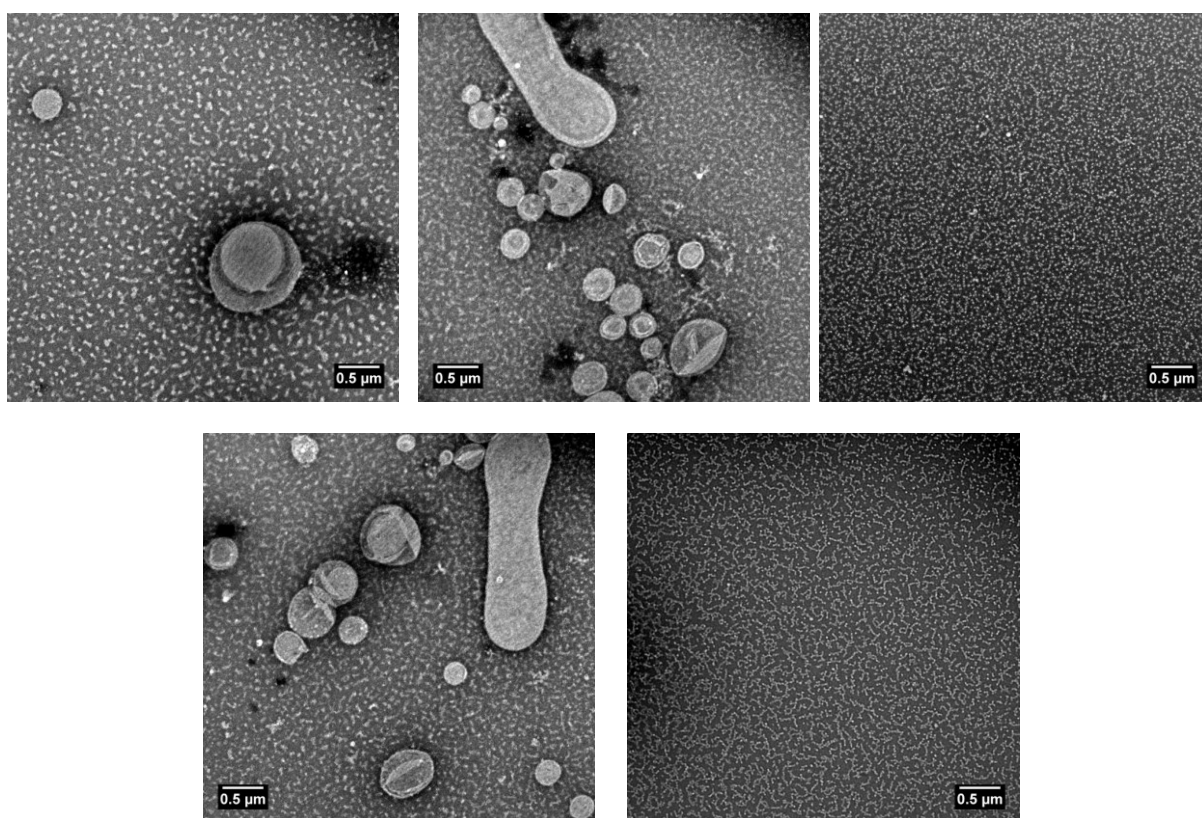

**Figure S7.** Representative TEM images of PEG<sub>113</sub>-*b*-HPMA<sub>100</sub> formed at 25 wt% HPMA (Mixed).

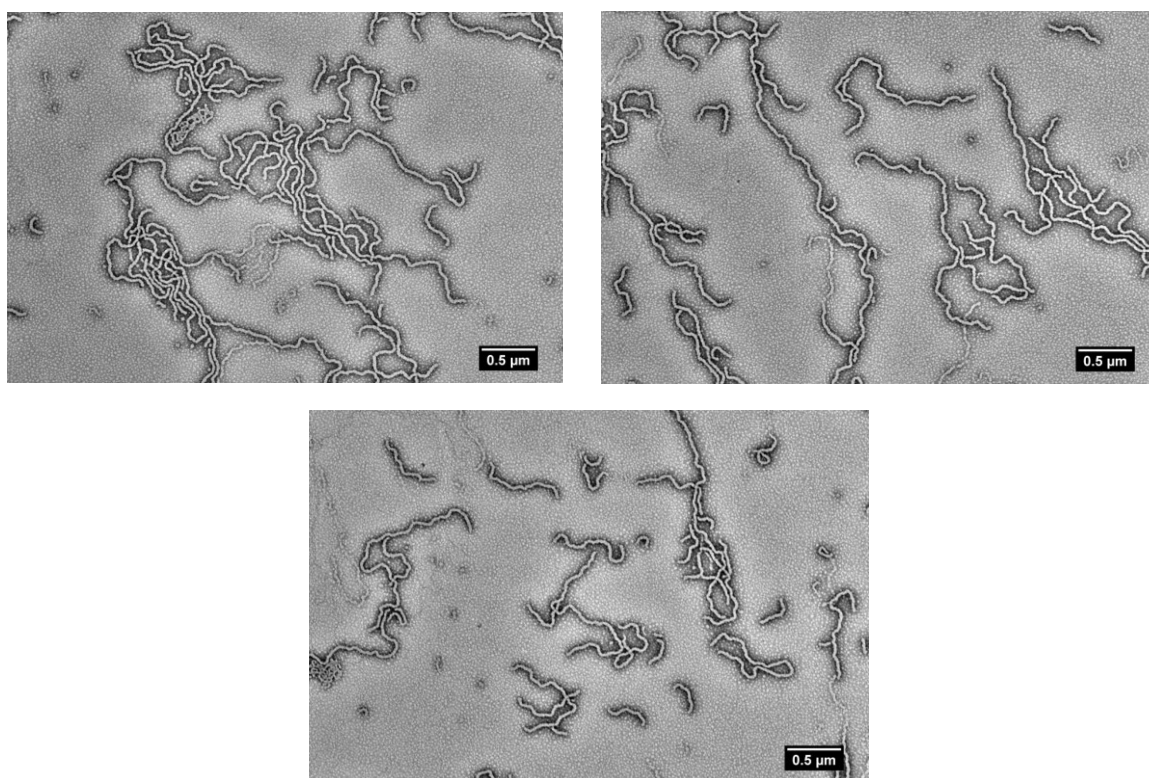

**Figure S8.** Representative TEM images of PEG<sub>113</sub>-*b*-HPMA<sub>200</sub> formed at 10 wt% HPMA (W).

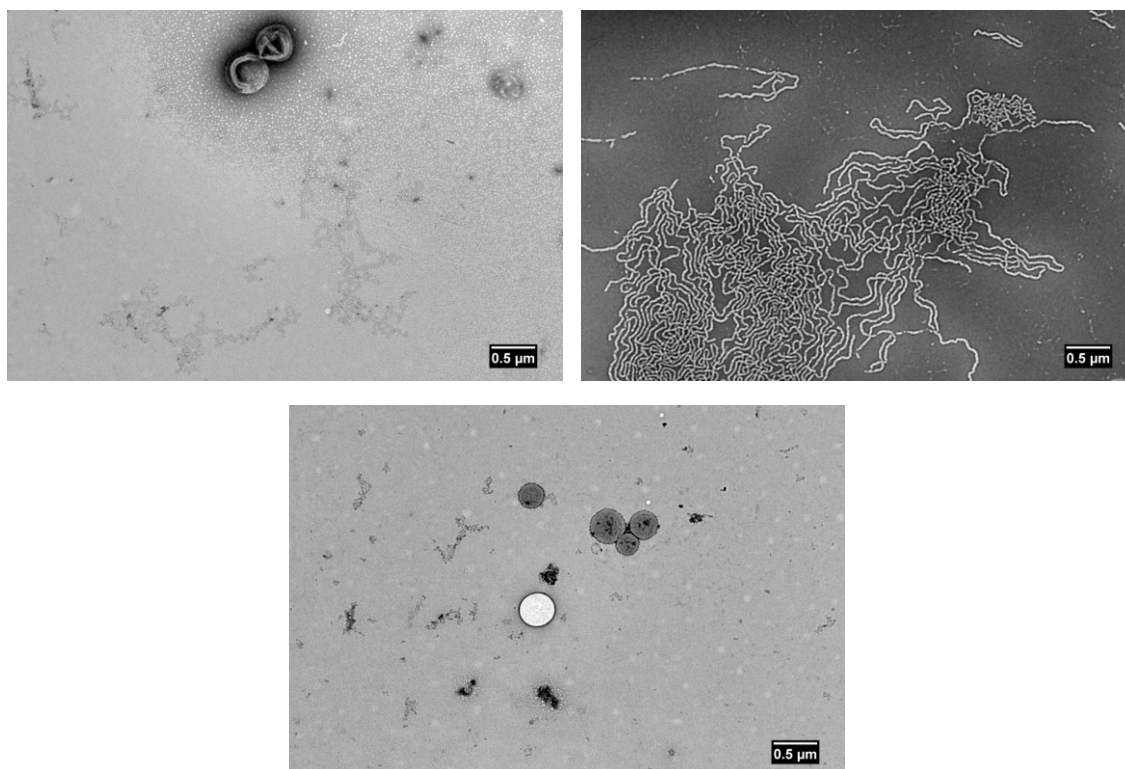

**Figure S9.** Representative TEM images of PEG<sub>113</sub>-*b*-HPMA<sub>200</sub> formed at 15 wt% HPMA (W+ULV).

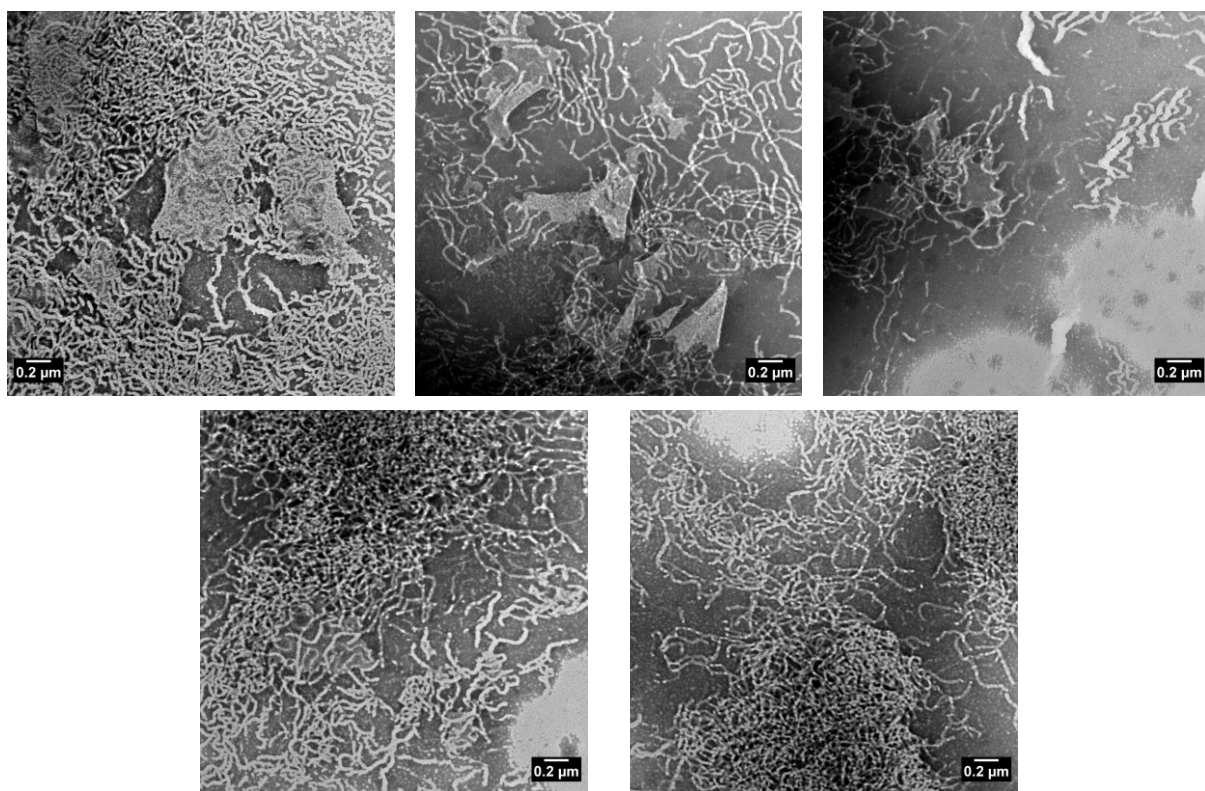

**Figure S10.** Representative TEM images of PEG<sub>113</sub>-*b*-HPMA<sub>200</sub> formed at 20 wt% HPMA (W+L).

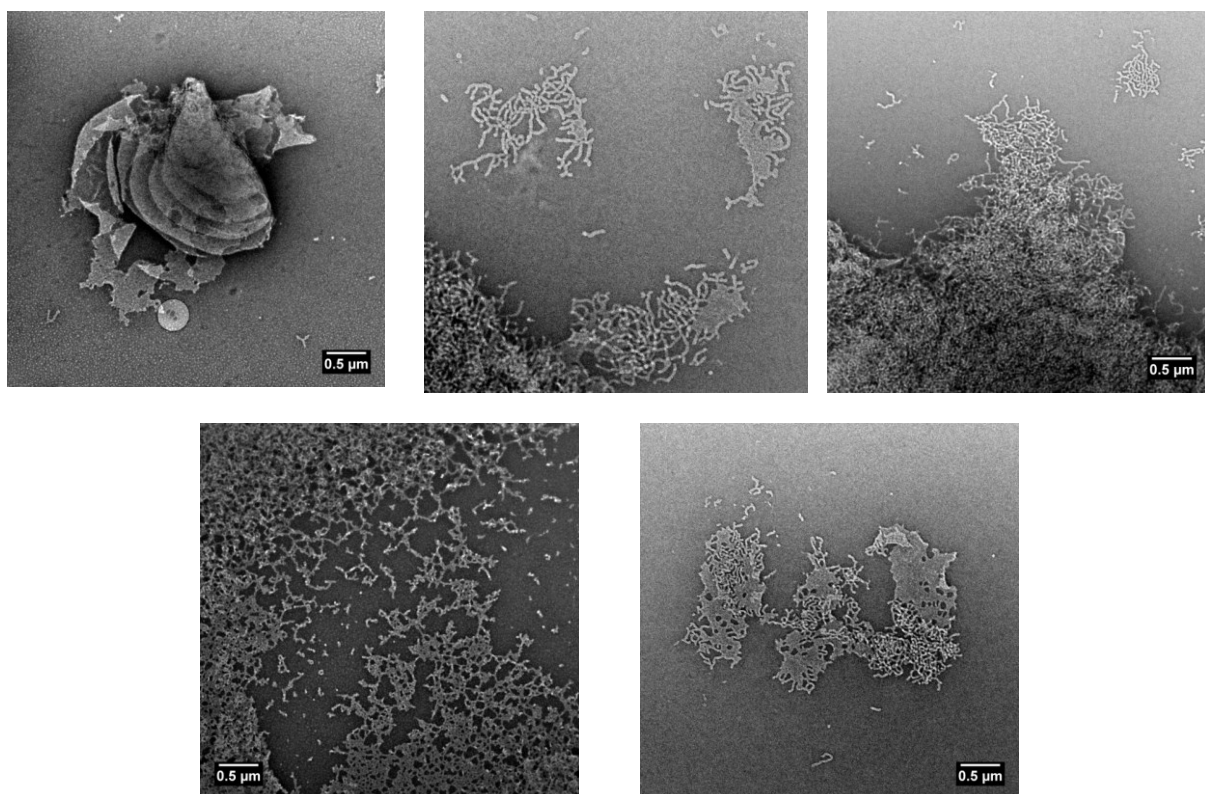

**Figure S11.** Representative TEM images of PEG<sub>113</sub>-*b*-HPMA<sub>200</sub> formed at 25 wt% HPMA (W+L).



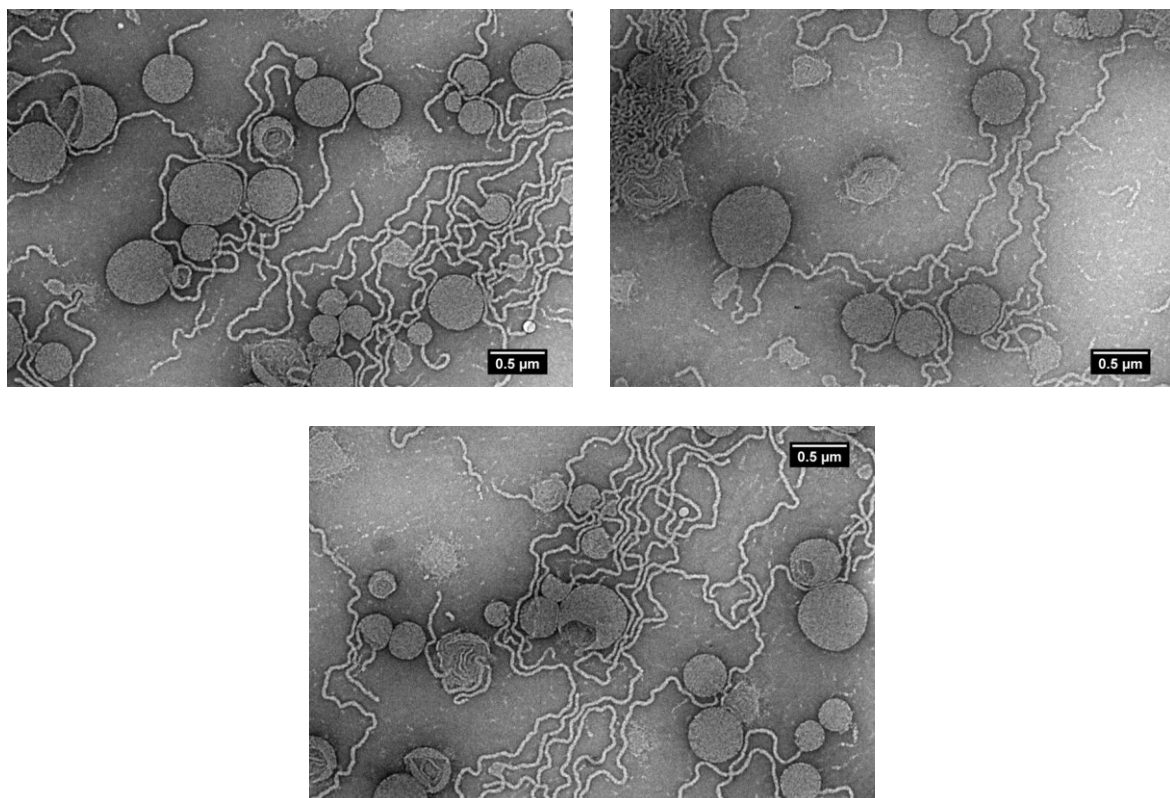

**Figure S12.** Representative TEM images of PEG<sub>113</sub>-*b*-HPMA<sub>300</sub> formed at 10 wt% HPMA (W+ULV).

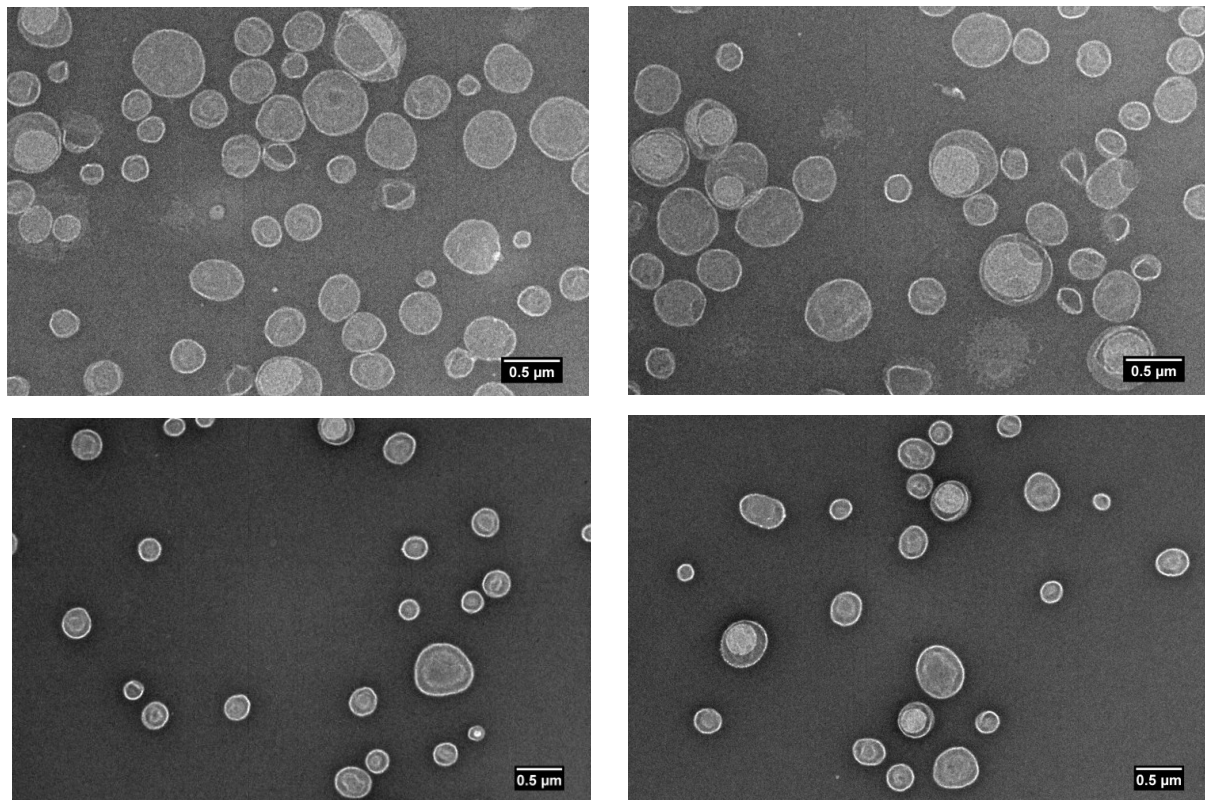

**Figure S13.** Representative TEM images of PEG<sub>113</sub>-*b*-HPMA<sub>300</sub> formed at 15 wt% HPMA (ULV).

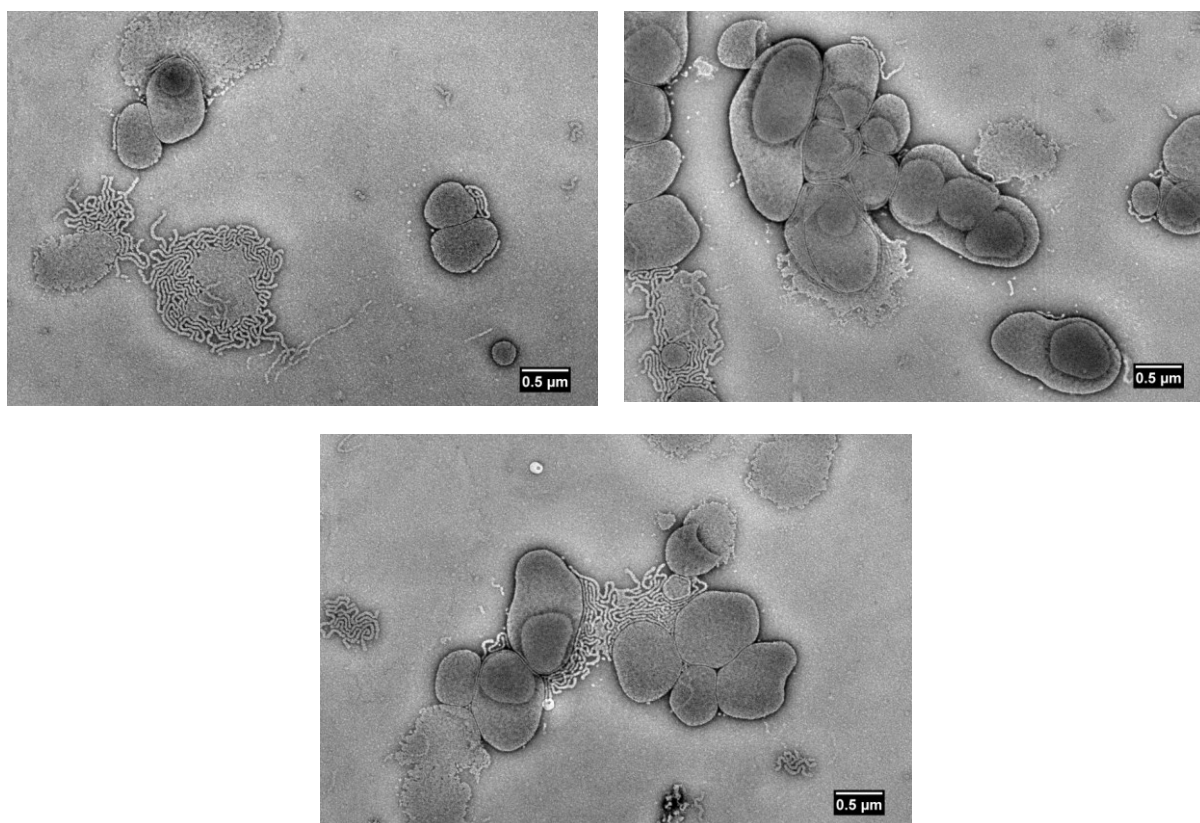

**Figure S14.** Representative TEM images of PEG<sub>113</sub>-*b*-HPMA<sub>300</sub> formed at 20 wt% HPMA (W+ULV+MLV).

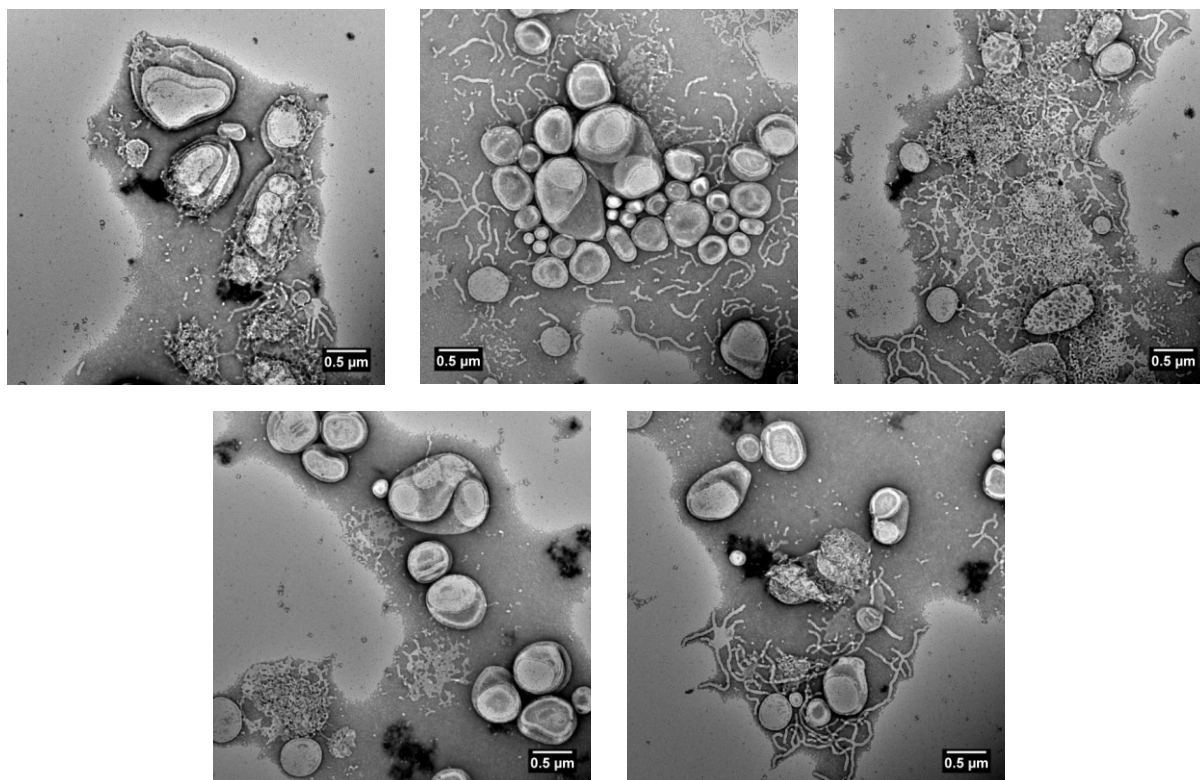

**Figure S15.** Representative TEM images of PEG<sub>113</sub>-*b*-HPMA<sub>300</sub> formed at 25 wt% HPMA (W+ULV+MLV).

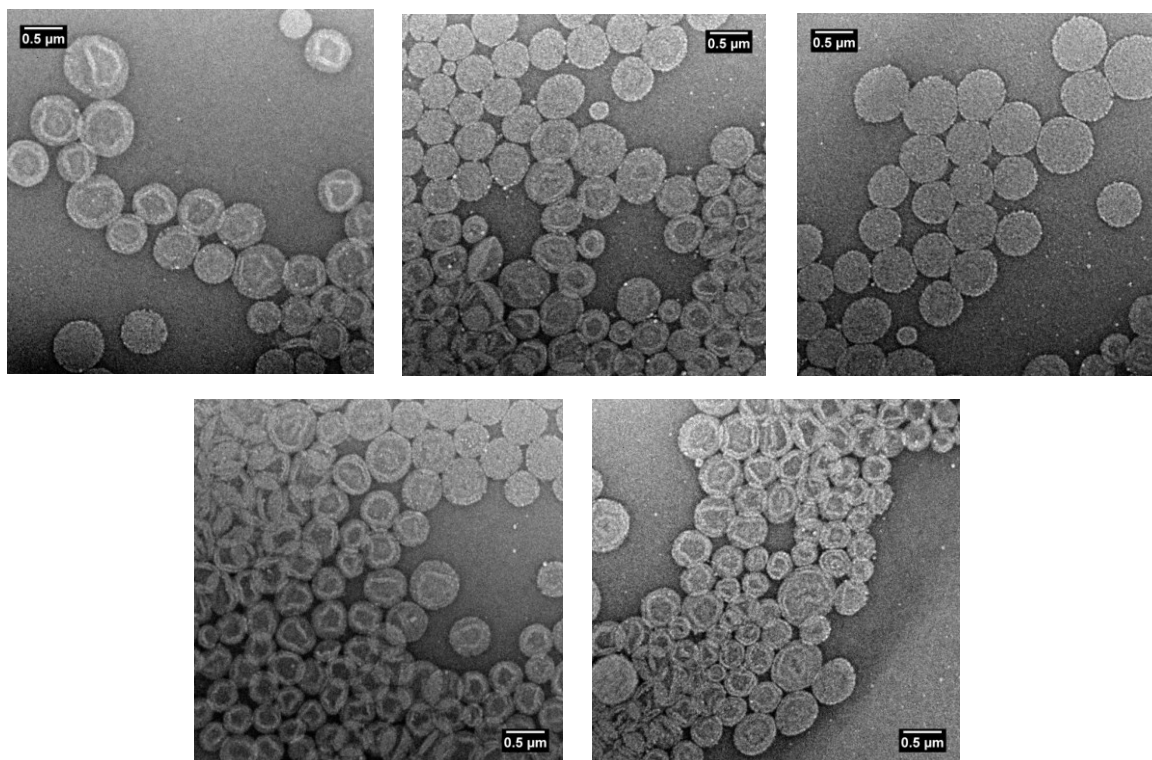

**Figure S16.** Representative TEM images of PEG<sub>113</sub>-*b*-HPMA<sub>400</sub> formed at 10 wt% HPMA (ULV).

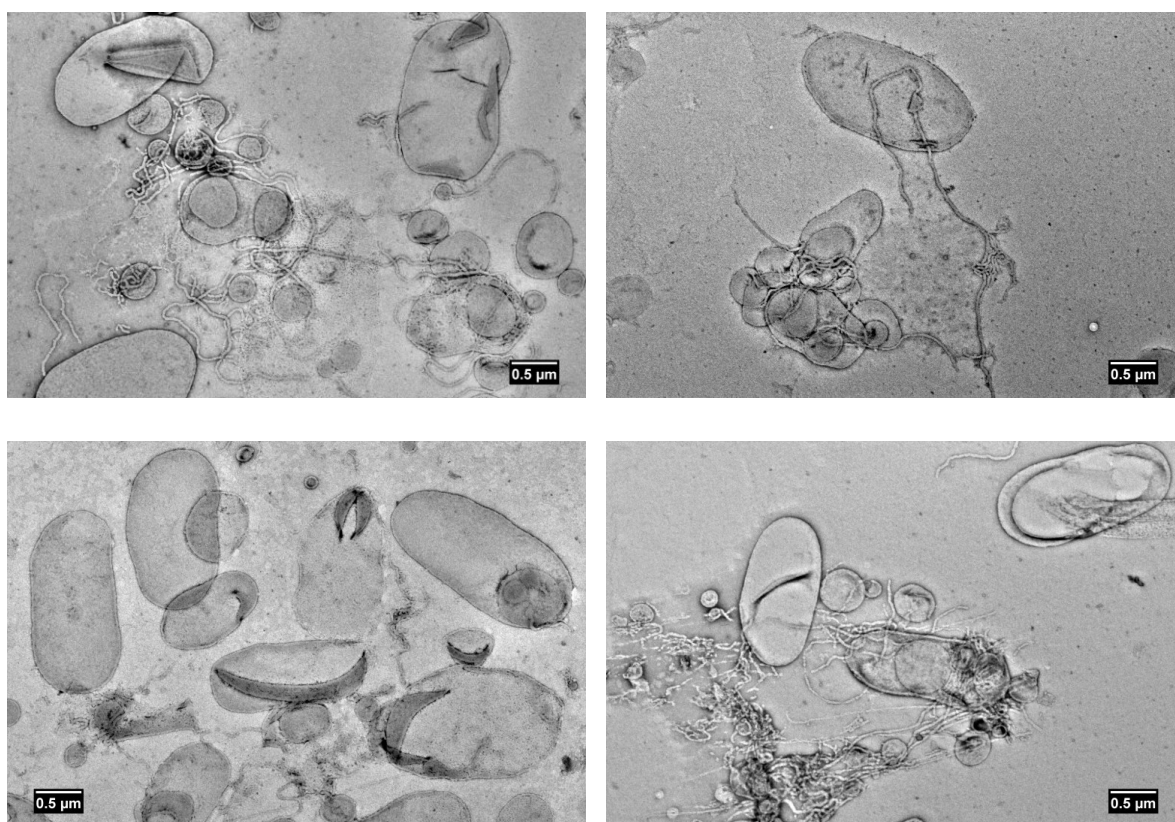

**Figure S17.** Representative TEM images of PEG<sub>113</sub>-*b*-HPMA<sub>400</sub> formed at 15 wt% HPMA (W+ULV+MLV).

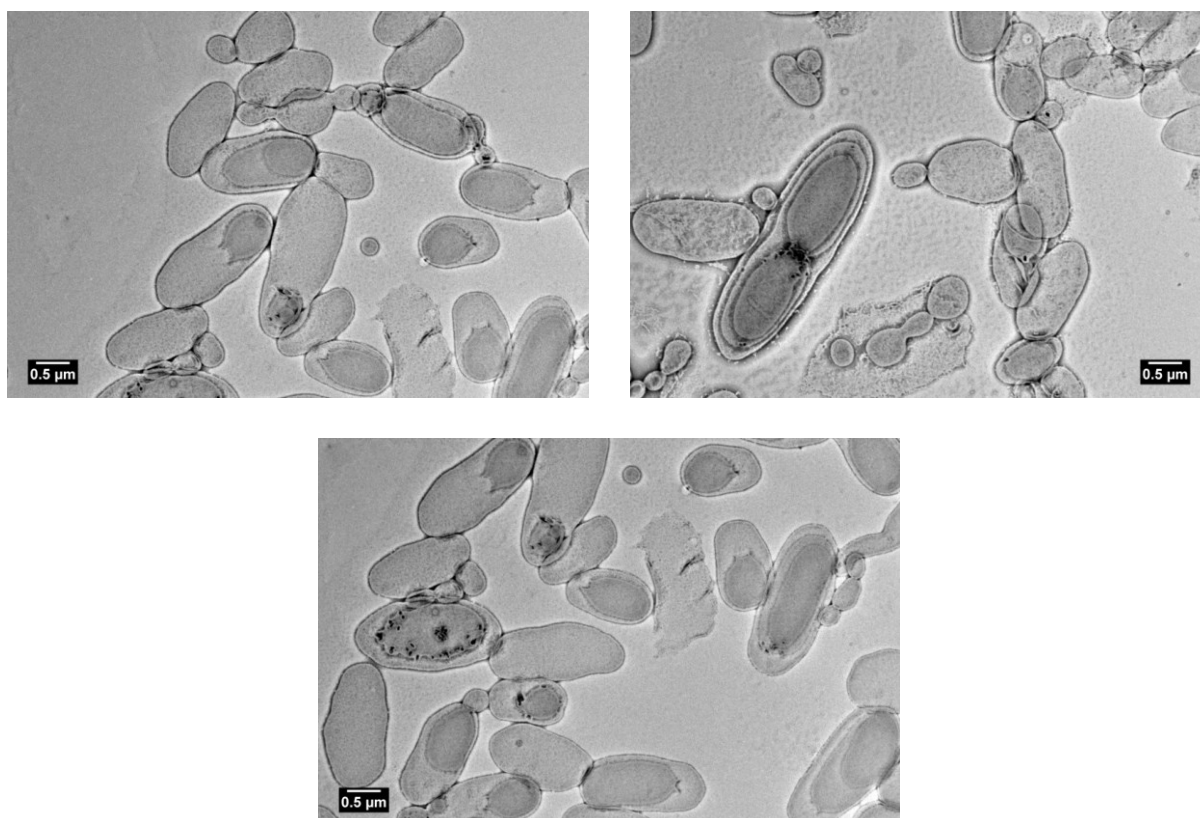

**Figure S18.** Representative TEM images of PEG<sub>113</sub>-*b*-HPMA<sub>400</sub> formed at 20 wt% HPMA (ULV+MLV).

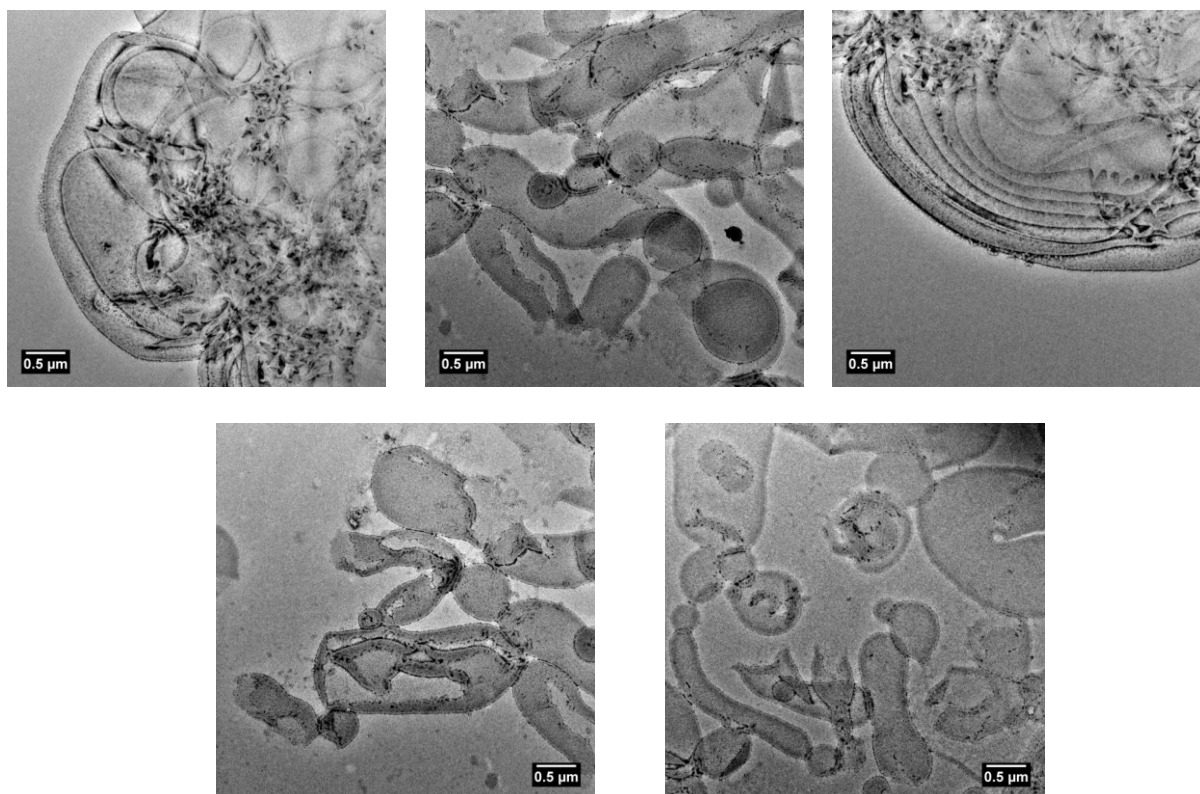

**Figure S19.** Representative TEM images of PEG<sub>113</sub>-*b*-HPMA<sub>400</sub> formed at 25 wt% HPMA (ULV+MLV).



### Supplementary TEM data for formulations formed by route B

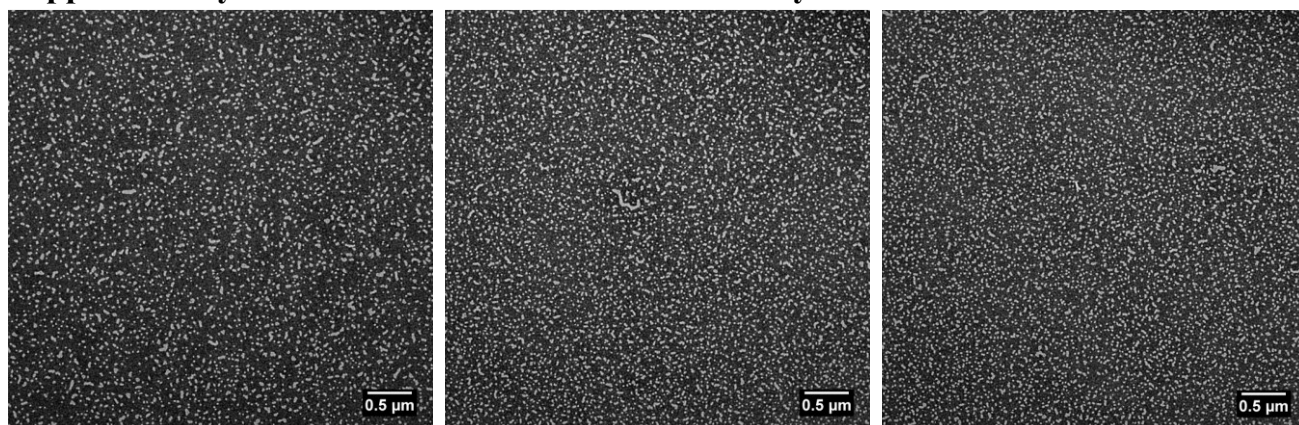

**Figure S20.** Representative TEM images of PEG<sub>113</sub>-*b*-HPMA<sub>100</sub> formed at 10 wt% HPMA (S).

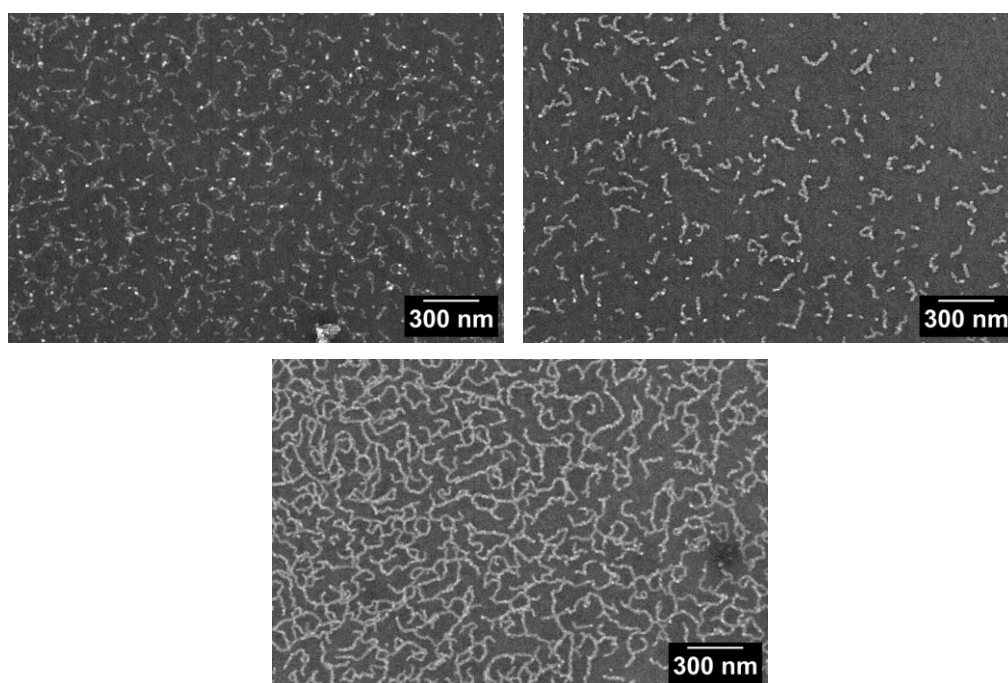

**Figure S21.** Representative TEM images of PEG<sub>113</sub>-*b*-HPMA<sub>100</sub> formed at 15 wt% HPMA (S+W).

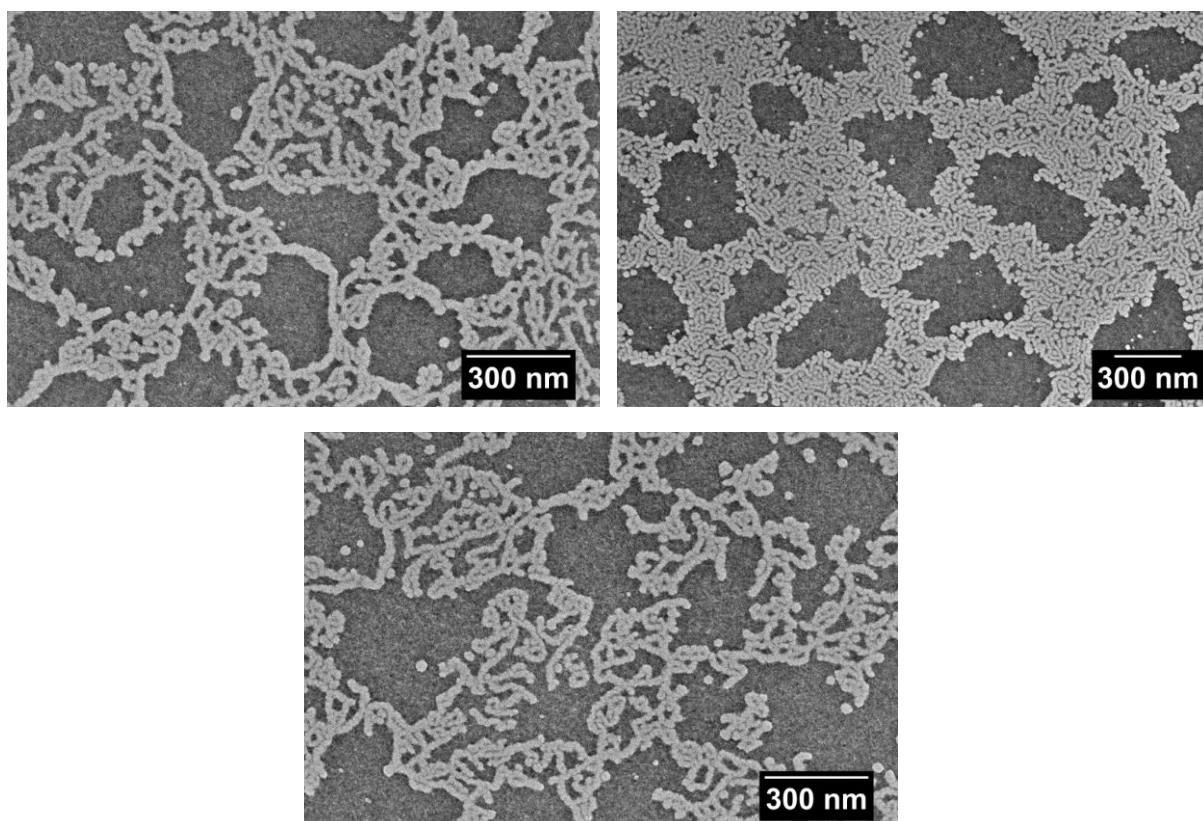

**Figure S22.** Representative TEM images of PEG<sub>113</sub>-*b*-HPMA<sub>100</sub> formed at 20 wt% HPMA (S+W).

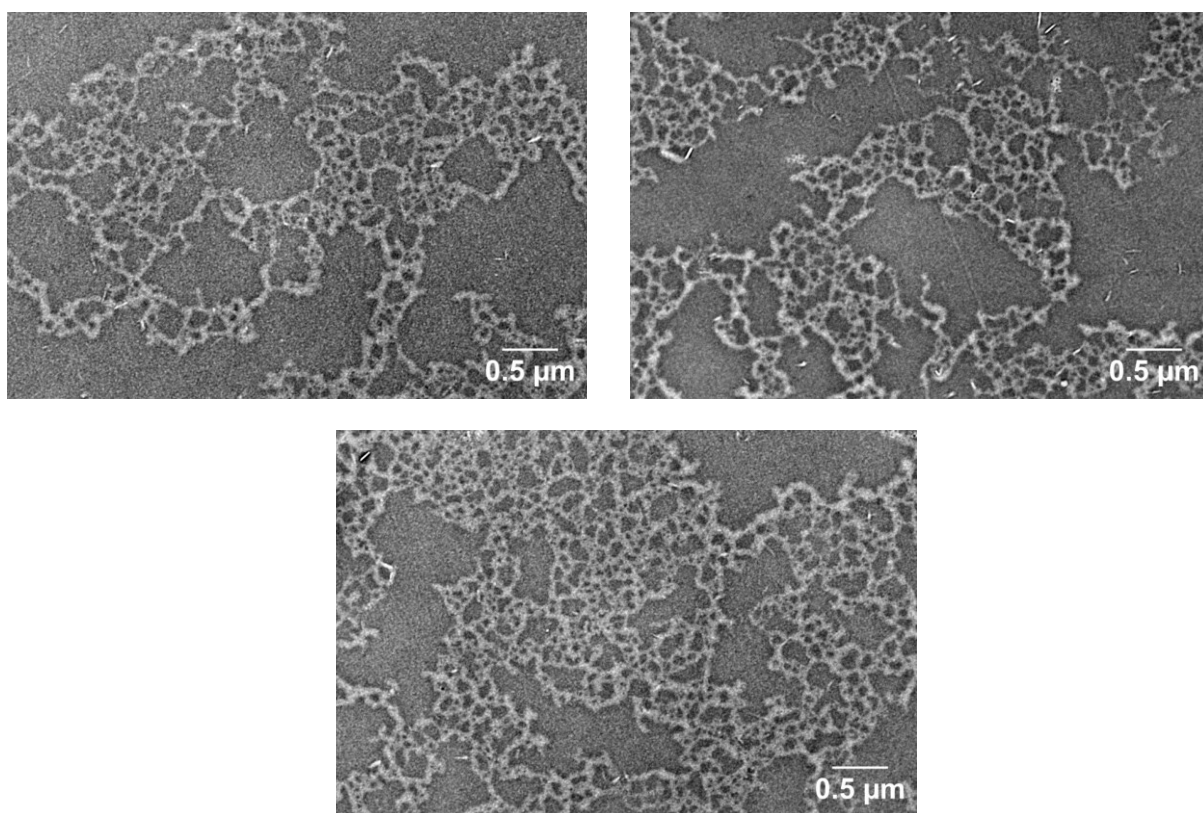

**Figure S23.** Representative TEM images of PEG<sub>113</sub>-*b*-HPMA<sub>100</sub> formed at 25 wt% HPMA (W).



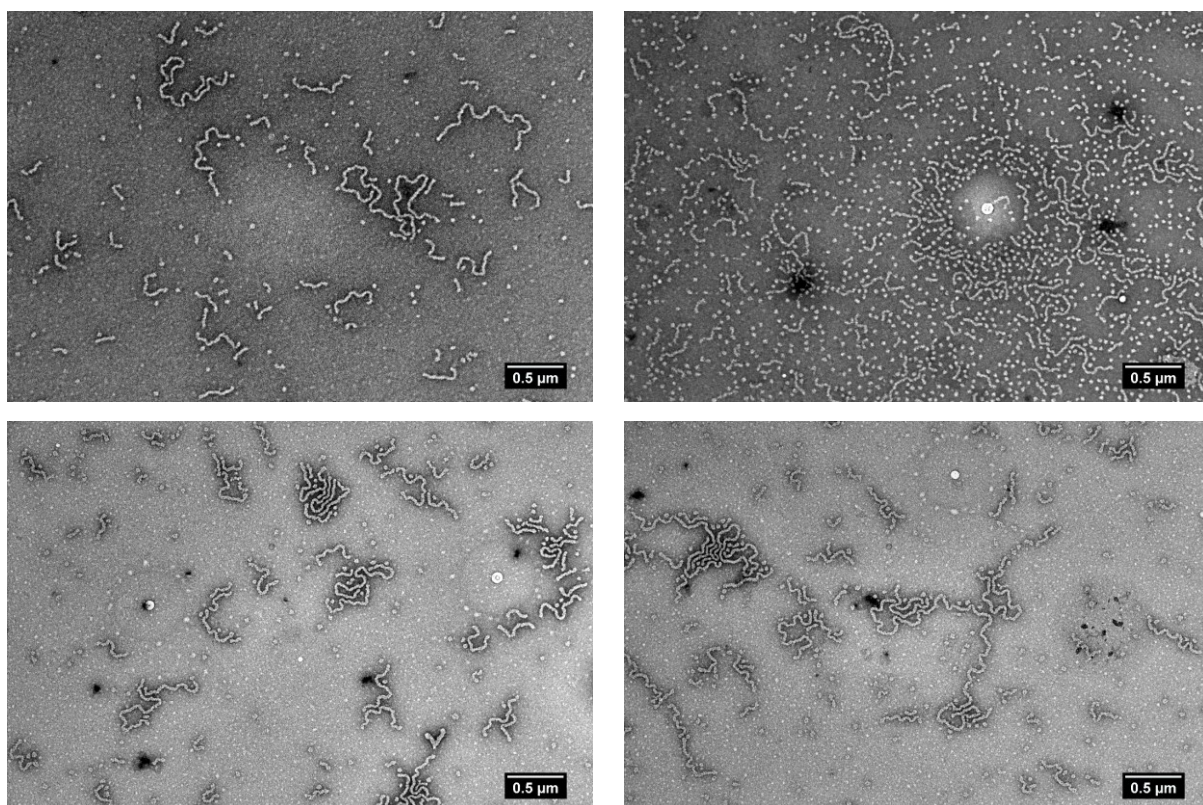

**Figure S24.** Representative TEM images of PEG<sub>113</sub>-*b*-HPMA<sub>200</sub> formed at 10 wt% HPMA. (S+W).

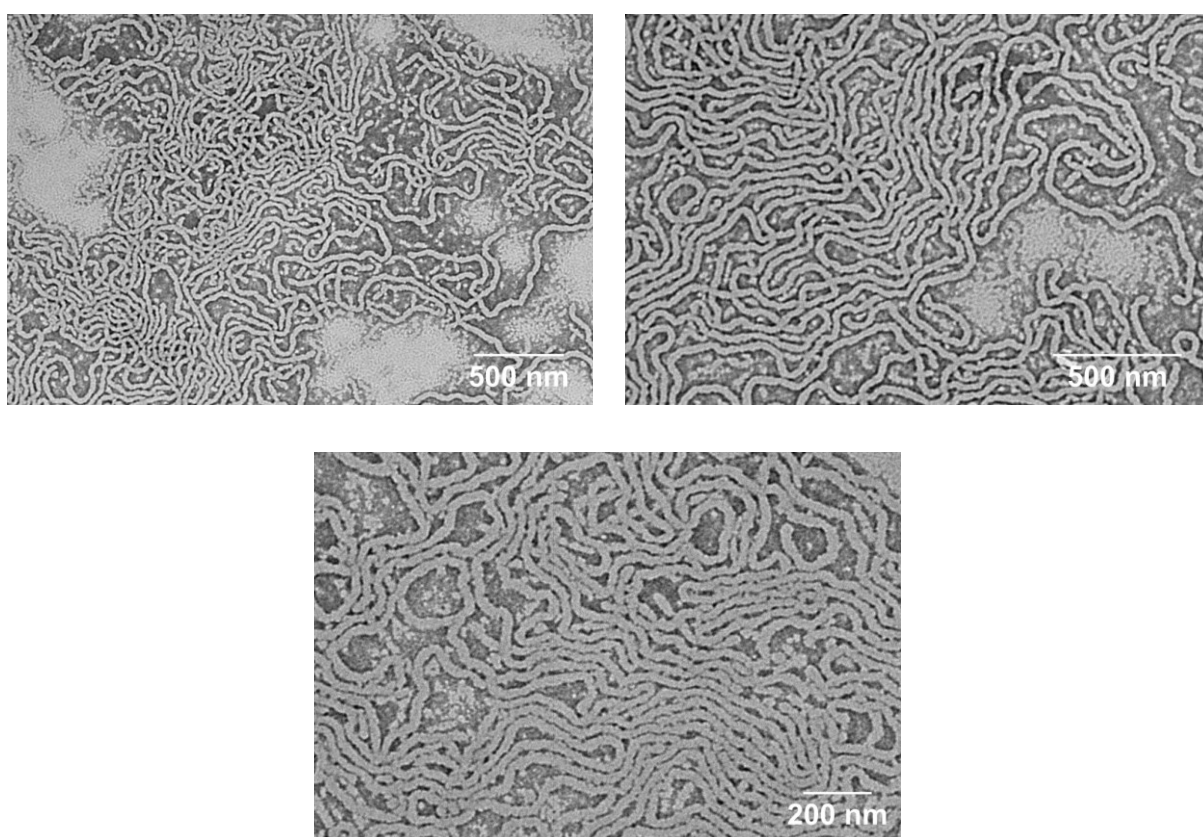

**Figure S25.** Representative TEM images of PEG<sub>113</sub>-*b*-HPMA<sub>200</sub> formed at 15 wt% HPMA (W).

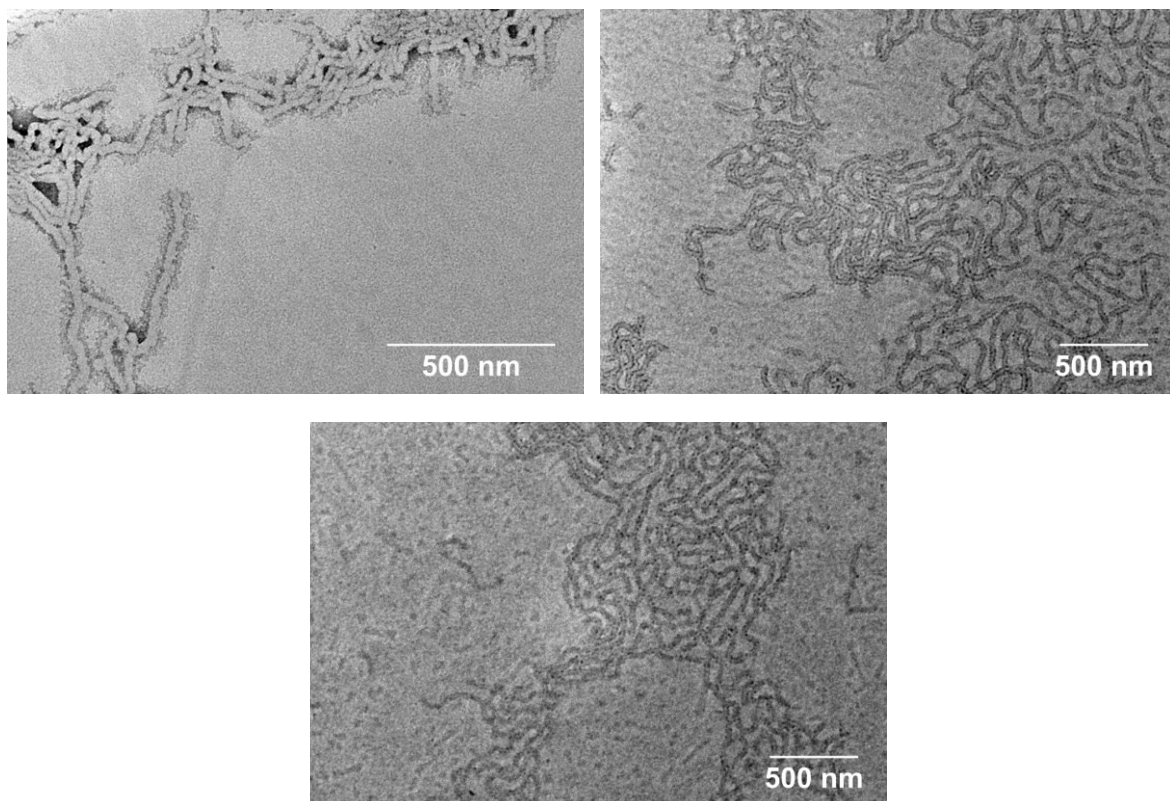

**Figure S26.** Representative TEM images of PEG<sub>113</sub>-*b*-HPMA<sub>200</sub> formed at 20 wt% HPMA (W).

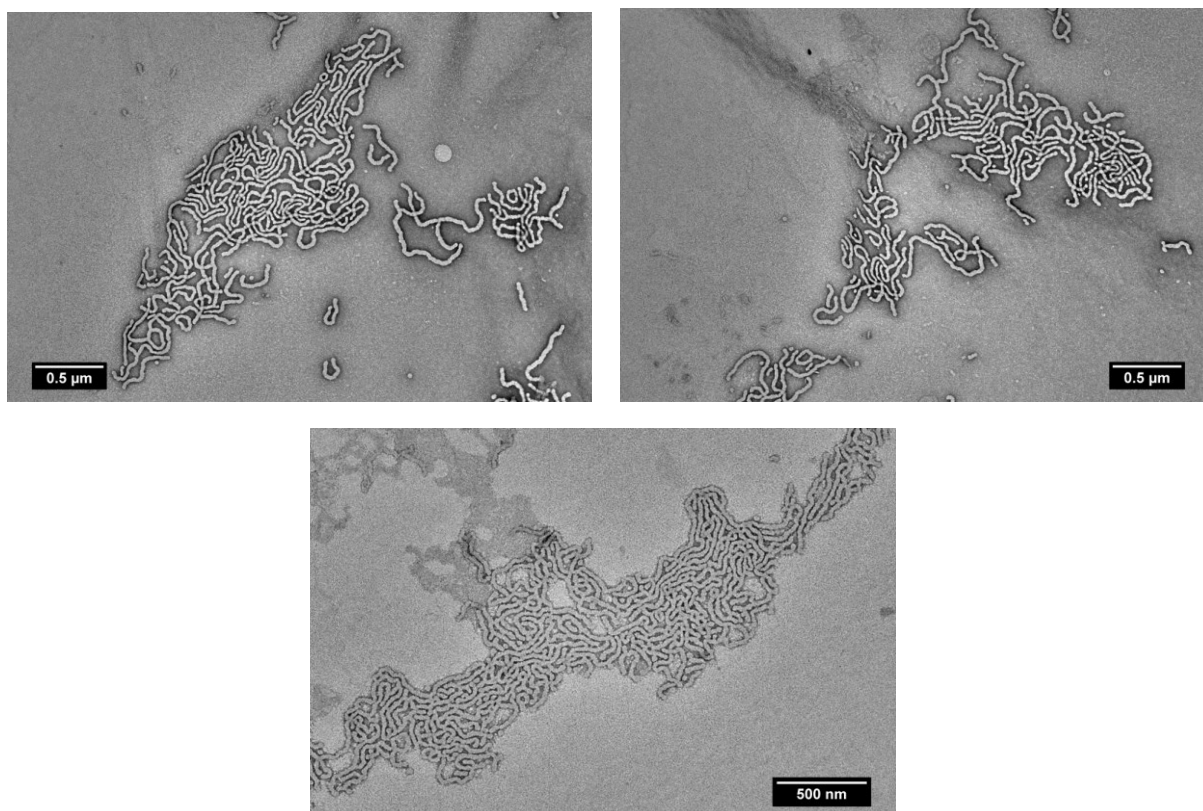

**Figure S27.** Representative TEM images of PEG<sub>113</sub>-*b*-HPMA<sub>200</sub> formed at 25 wt% HPMA (W).



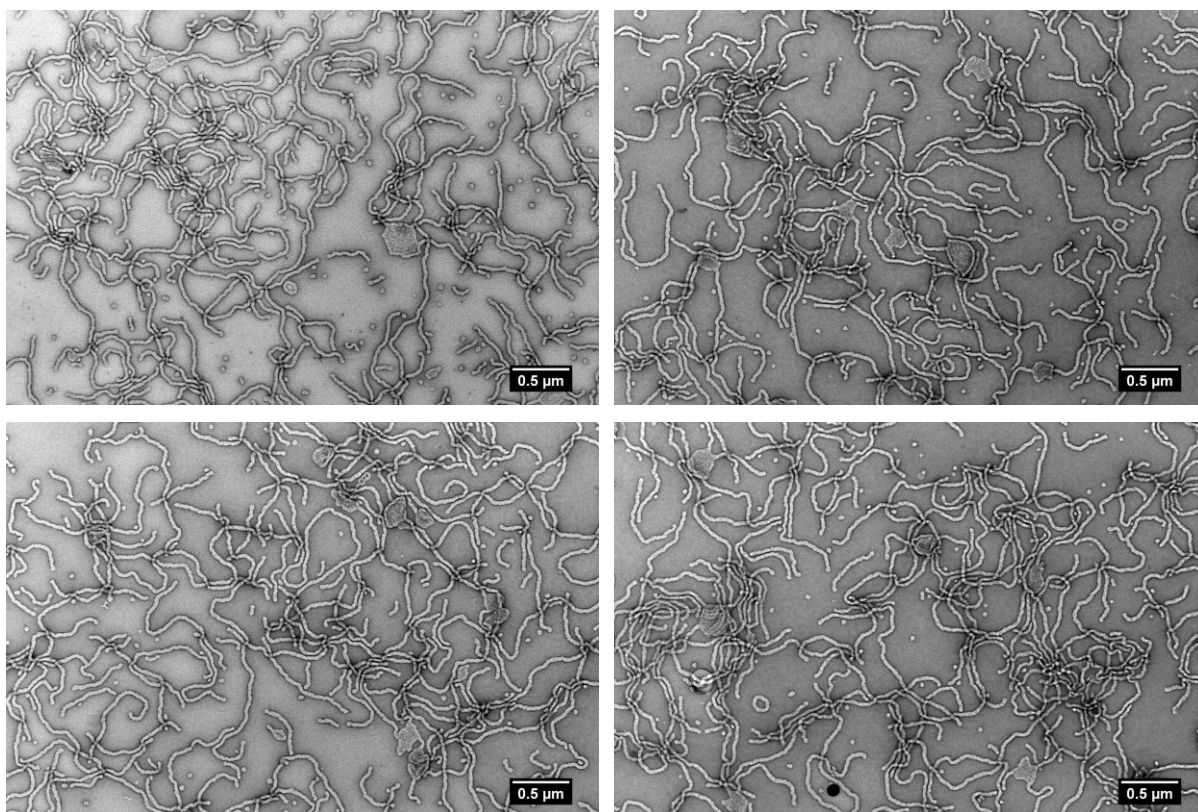

**Figure S28.** Representative TEM images of PEG<sub>113</sub>-*b*-HPMA<sub>300</sub> formed at 10 wt% HPMA (S+W).

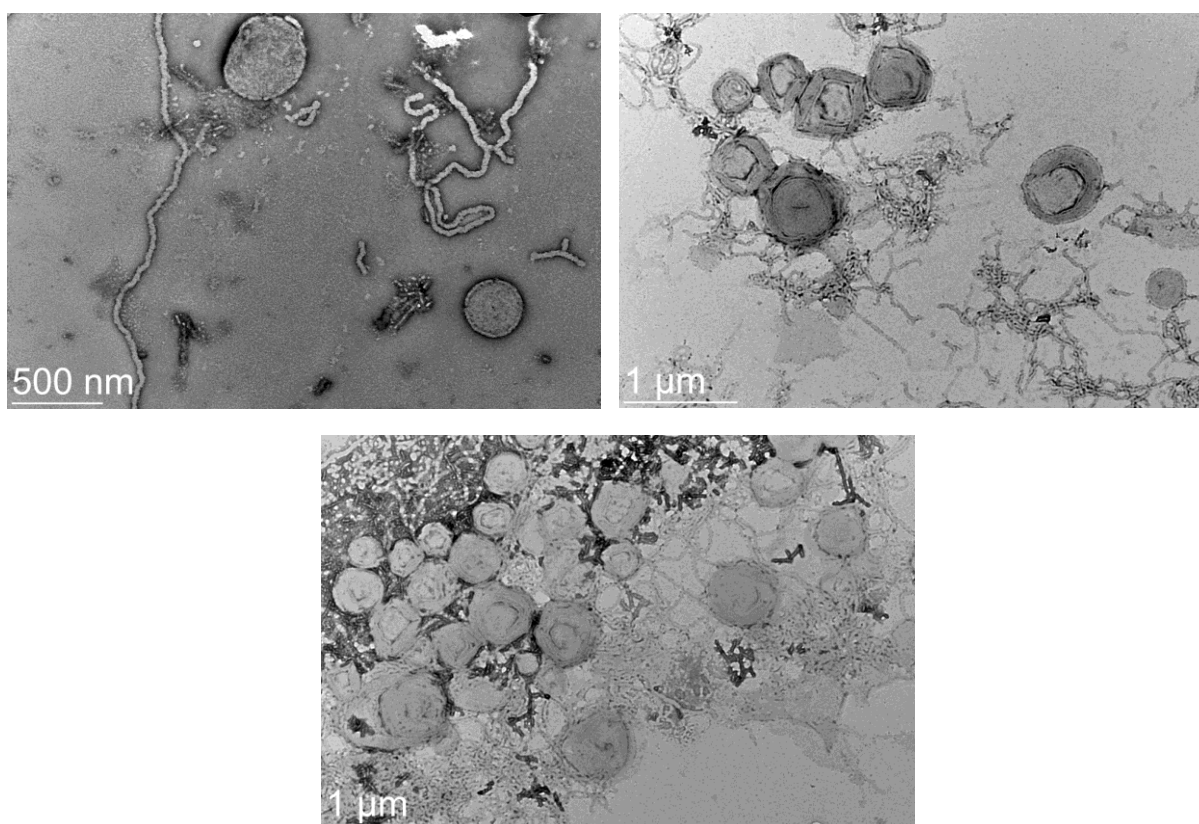

**Figure S29.** Representative TEM images of PEG<sub>113</sub>-*b*-HPMA<sub>300</sub> formed at 15 wt% HPMA (W+ULV).

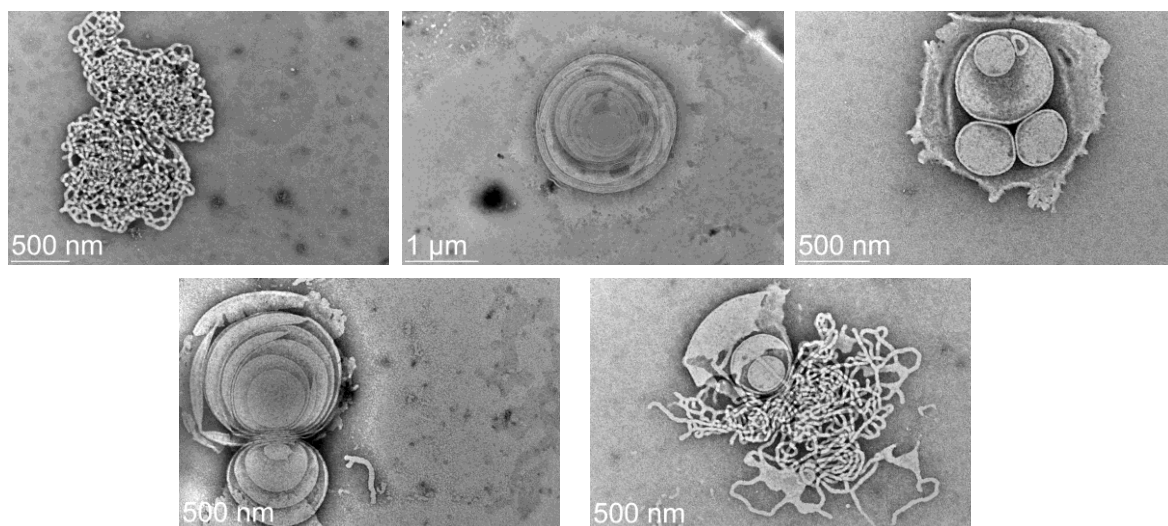

**Figure S30.** Representative TEM images of PEG<sub>113</sub>-*b*-HPMA<sub>300</sub> formed at 20 wt% HPMA (W+ULV+MLV).

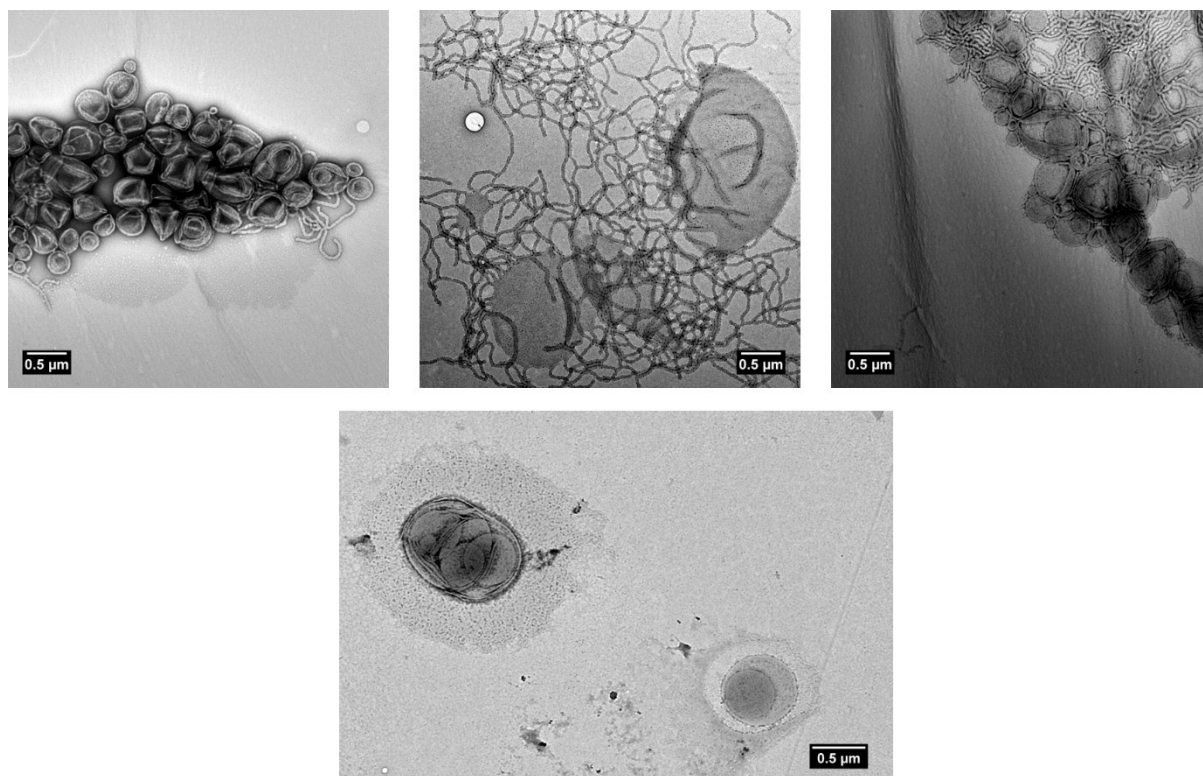

**Figure S31.** Representative TEM images of PEG<sub>113</sub>-*b*-HPMA<sub>300</sub> formed at 25 wt% HPMA (W+ULV+MLV).

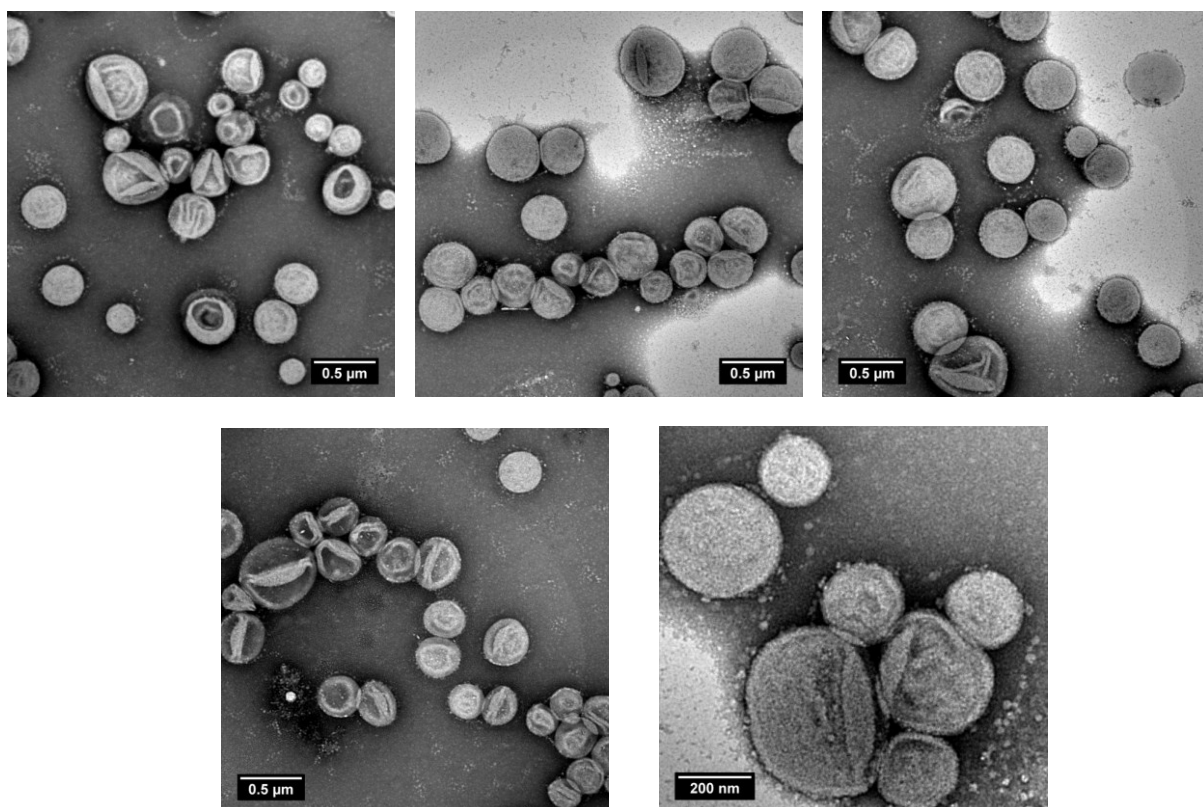

**Figure S32.** Representative TEM images of PEG<sub>113</sub>-*b*-HPMA<sub>400</sub> formed at 10 wt% HPMA (ULV).

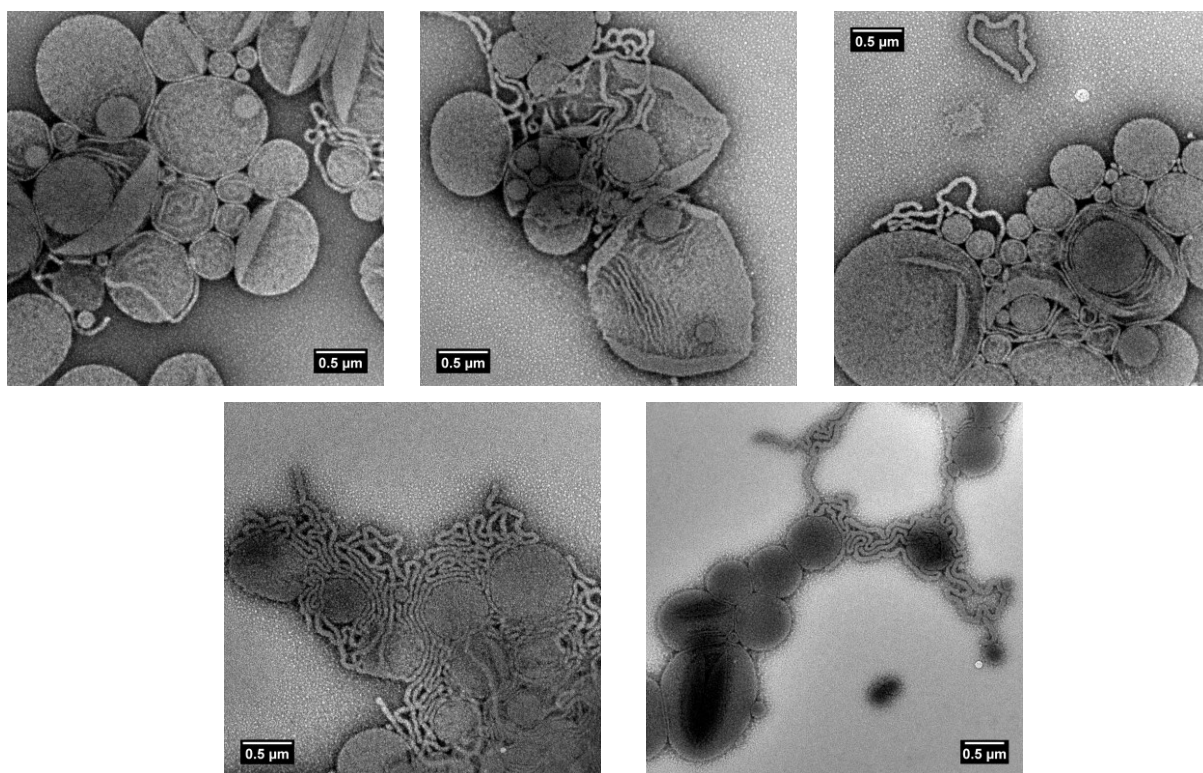

**Figure S33.** Representative TEM images of PEG<sub>113</sub>-*b*-HPMA<sub>400</sub> formed at 15 wt% HPMA (W+ULV+MLV).

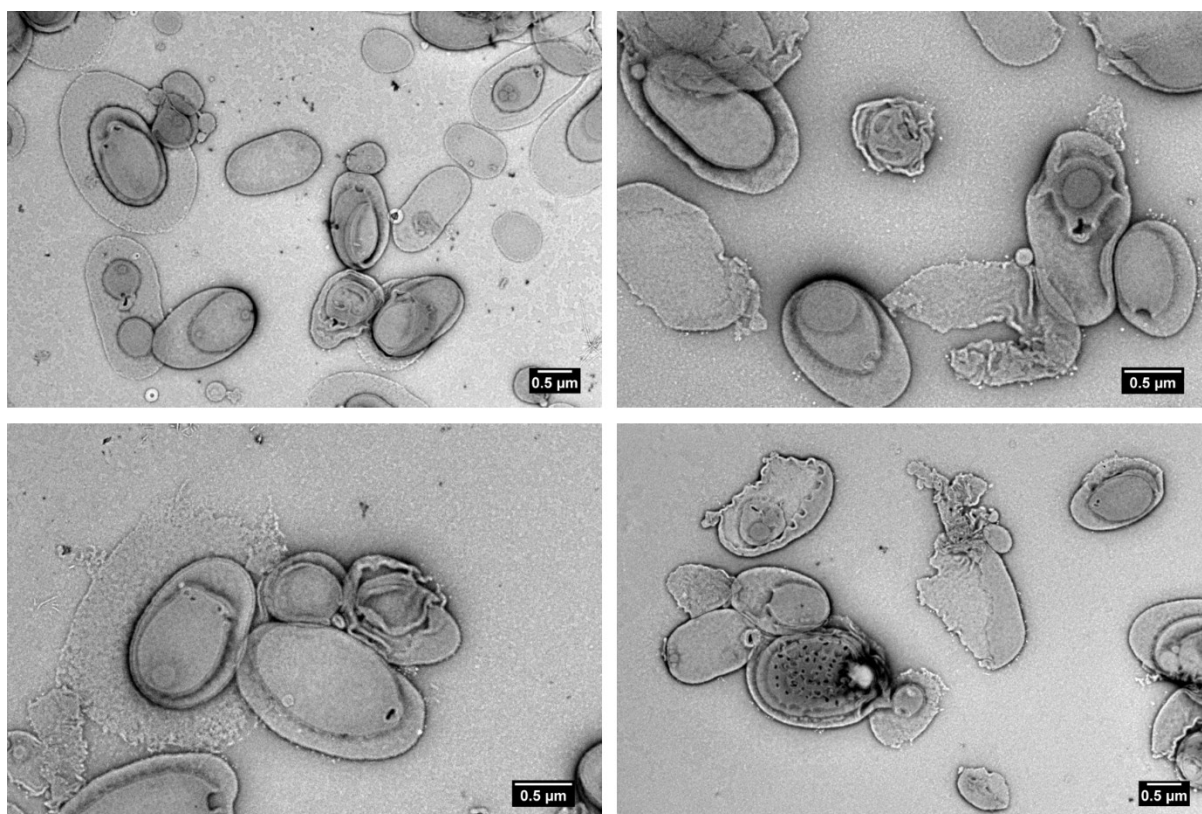

**Figure S34.** Representative TEM images of PEG<sub>113</sub>-*b*-HPMA<sub>400</sub> formed at 20 wt% HPMA (ULV+MLV).

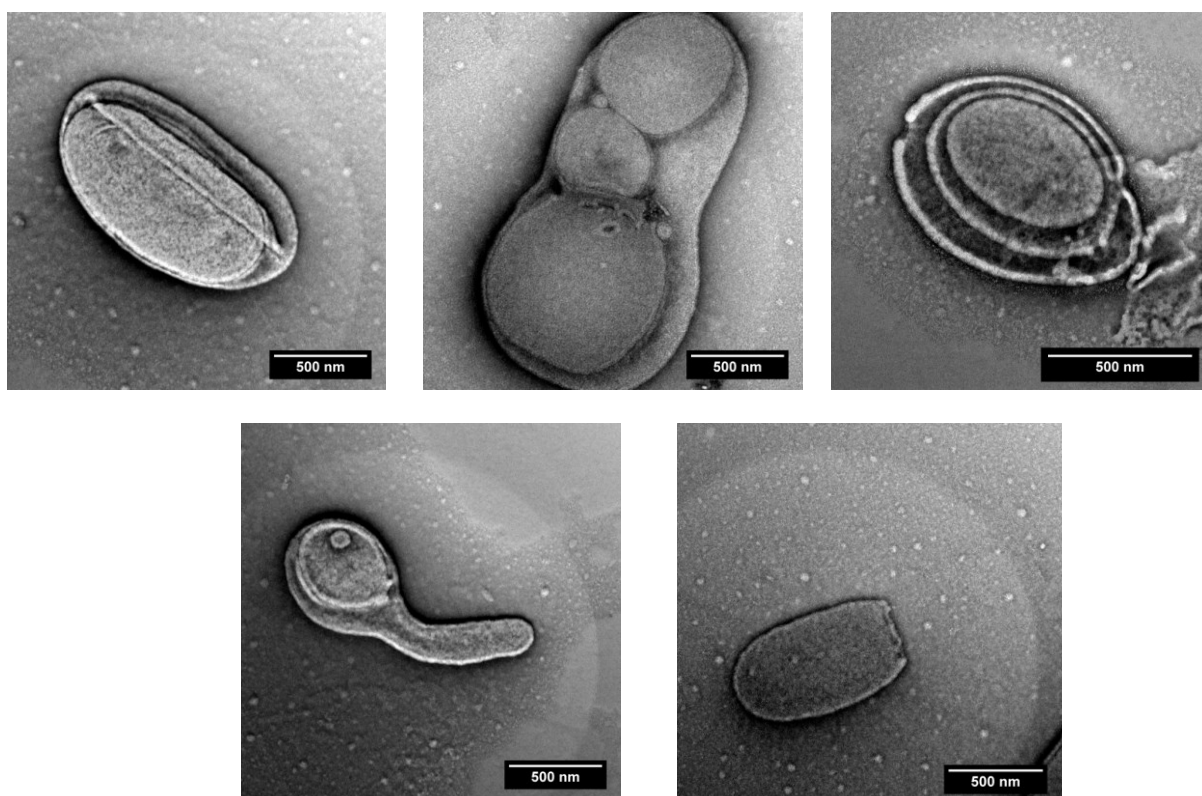

**Figure S35.** Representative TEM images of PEG<sub>113</sub>-*b*-HPMA<sub>400</sub> formed at 25 wt% HPMA (ULV+MLV).



### Supplementary DLS data for formulations formed by routes A and B

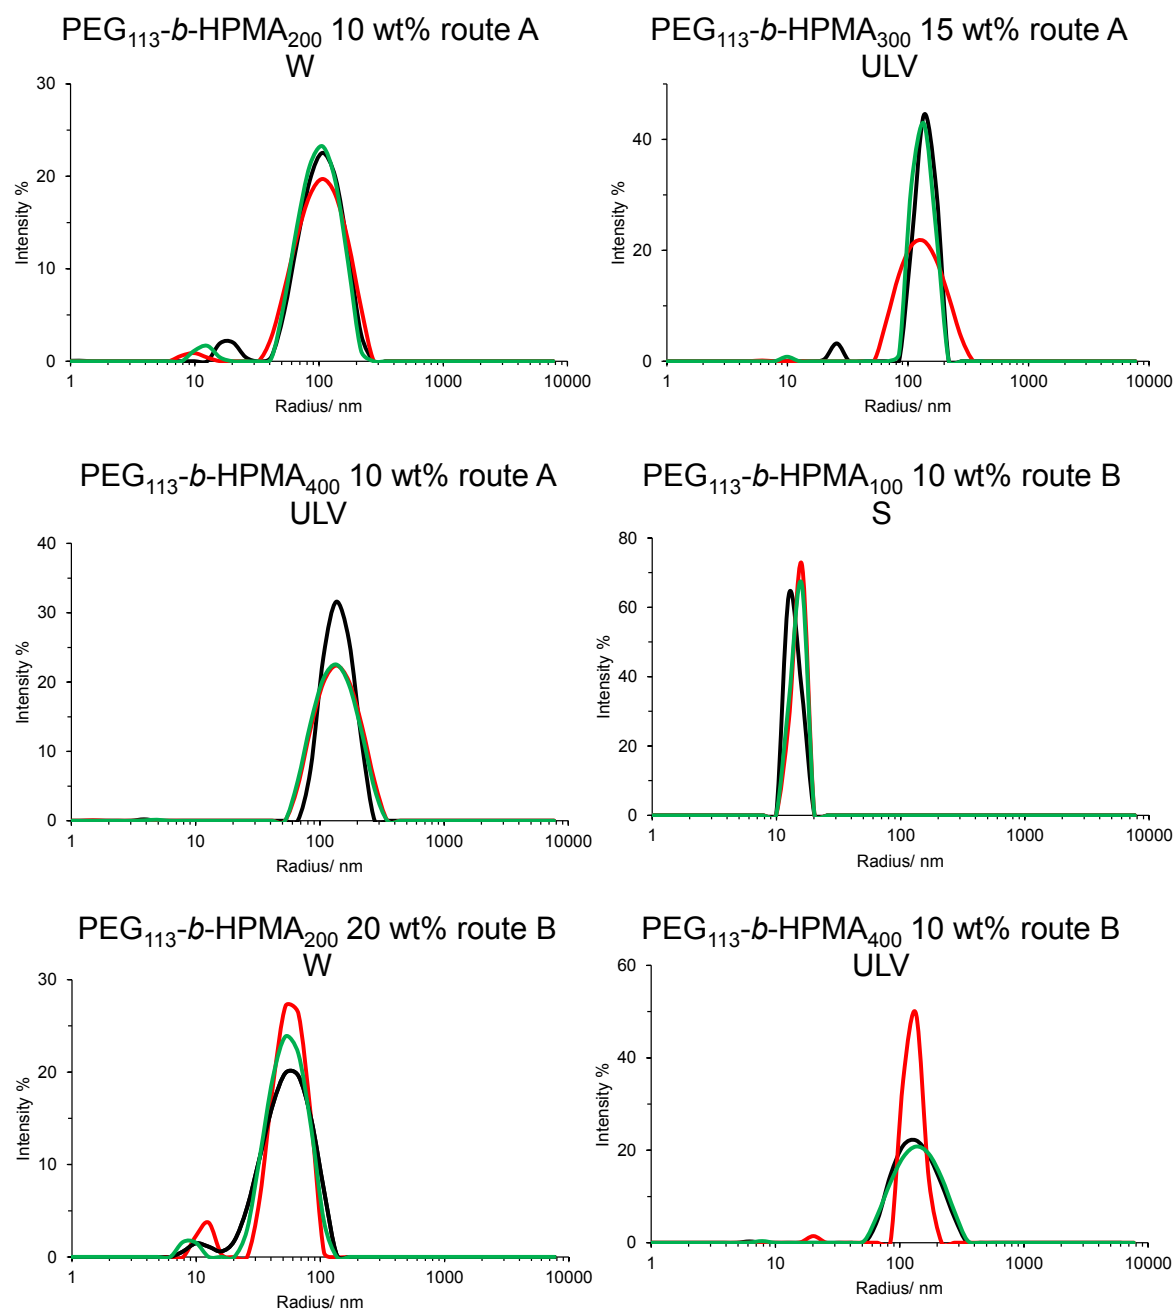

**Figure S36.** Intensity weighted size distributions of some representative pure phases obtained by DLS of PEG<sub>113</sub>-*b*-HPMA<sub>x</sub> formulations obtained by routes A or B at various concentrations, as indicated above each graph. Black, red and green traces represent separate repeat measurements. The morphology obtained from TEM is also stated above for reference.

### Histograms of PEG<sub>113</sub>-*b*-HPMA<sub>400</sub> unilamellar vesicles

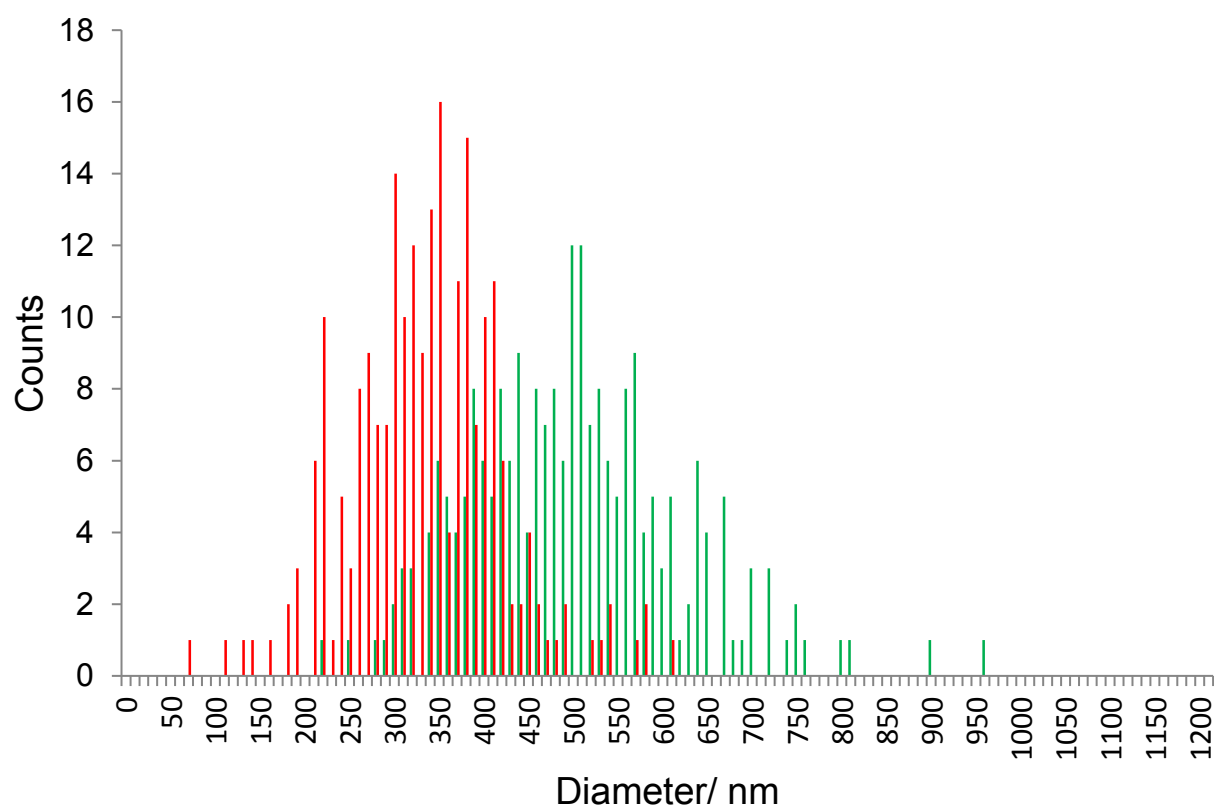

**Fig. S37.** Histograms of PEG<sub>113</sub>-*b*-HPMA<sub>400</sub> diblock copolymer unilamellar vesicles formed at [HPMA] = 10 wt% by route A (green) and route B (red) measured from particle counting measurements on TEM images. In each case at least 200 particles were analyzed.

## Supplementary data for formulations formed by route C

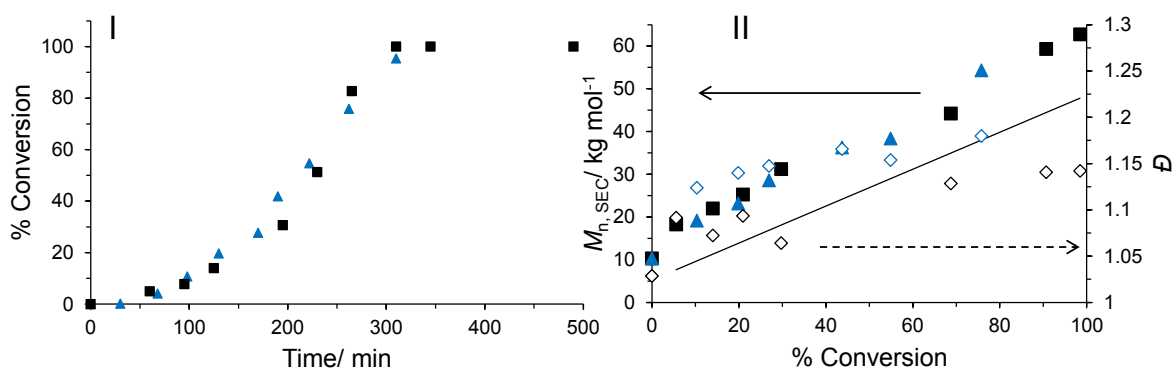

**Figure S38.** I: Kinetic study of the PEG<sub>113</sub>-*b*-HPMA<sub>300</sub> formulation at 10 wt% formed by route C (blue triangles) overlaid with the kinetic data previously obtained for that formed by route B (black squares). II: SEC data for the kinetic studies. Left axis:  $M_n$  values of polymers formed by route C (blue triangles) and route B (black squares), the black linear trend shows the expected  $M_n$  values. Right axis:  $\bar{D}$  values of polymers formed by route C (blue triangles) and route B (black diamonds).

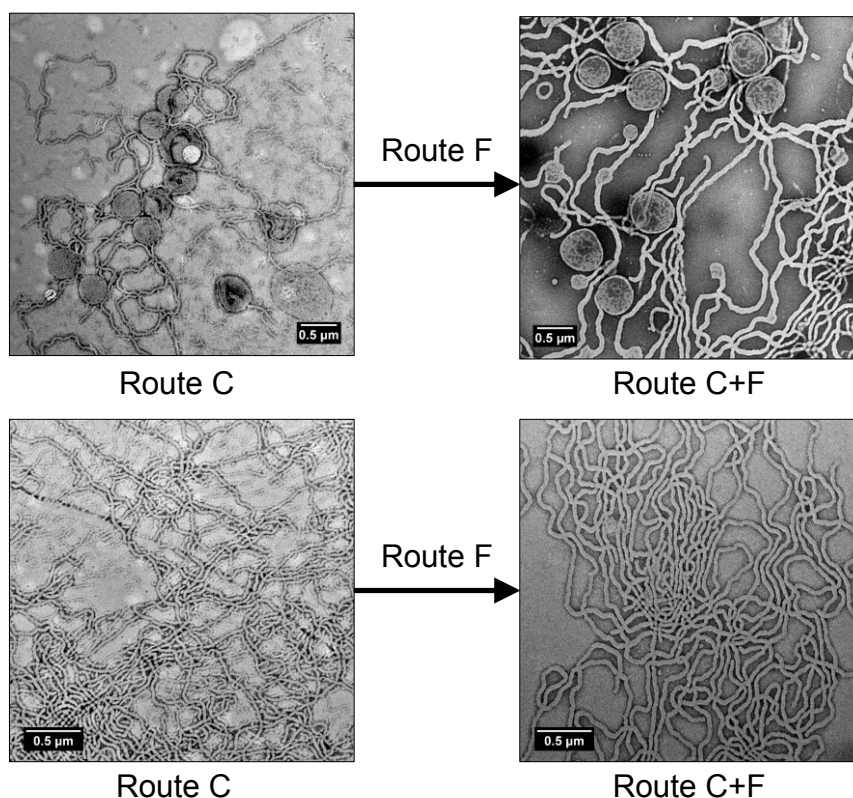

**Figure S39.** Representative TEM images showing no morphology change in formulations formed by route C (photoinitiation 20% light intensity at 37 °C) post-synthetically treated with route F (irradiation with 20% light intensity at 37 °C for 18 h). PEG<sub>113</sub>-*b*-HPMA<sub>300</sub> at 10 wt% HPMA (top) and PEG<sub>113</sub>-*b*-HPMA<sub>200</sub> at 15 wt% HPMA (bottom) are shown.

## Supplementary data for the post-synthetic irradiation experiments

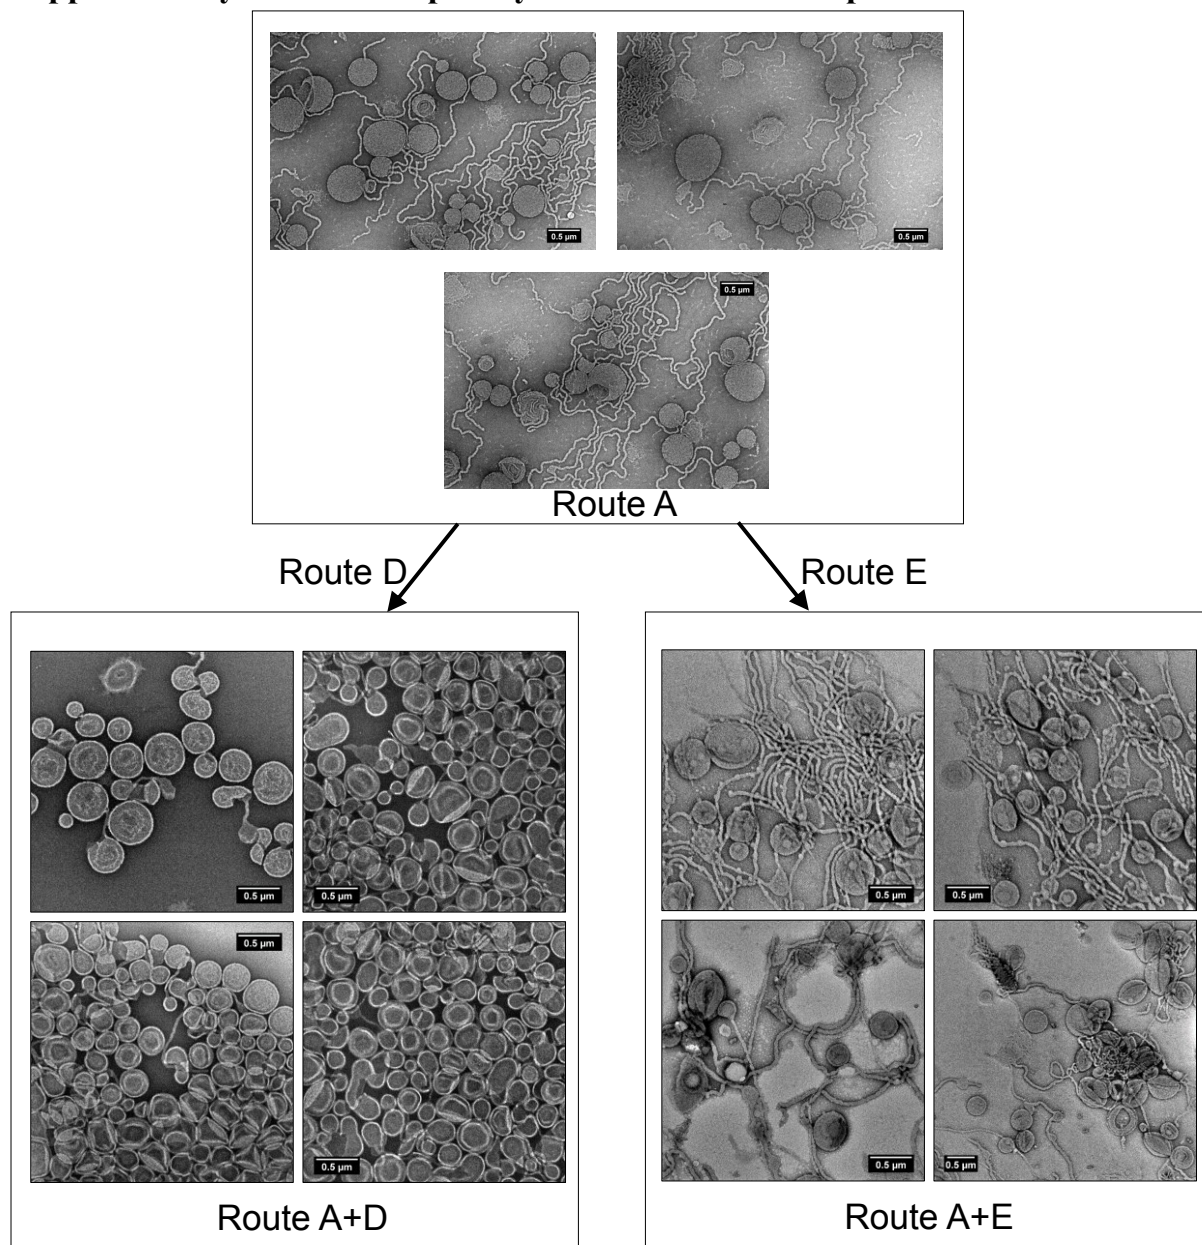

**Figure S40.** Representative TEM images showing morphology change of PEG<sub>113</sub>-*b*-HPMA<sub>300</sub> at 10 wt% obtained by route A+D and A+E. Key: Route A = 100% light intensity photoinitiation at 37 °C. Route D = 100% light intensity photoirradiation at 37 °C for 18 h. Route E = incubation at 37 °C for 18 h.



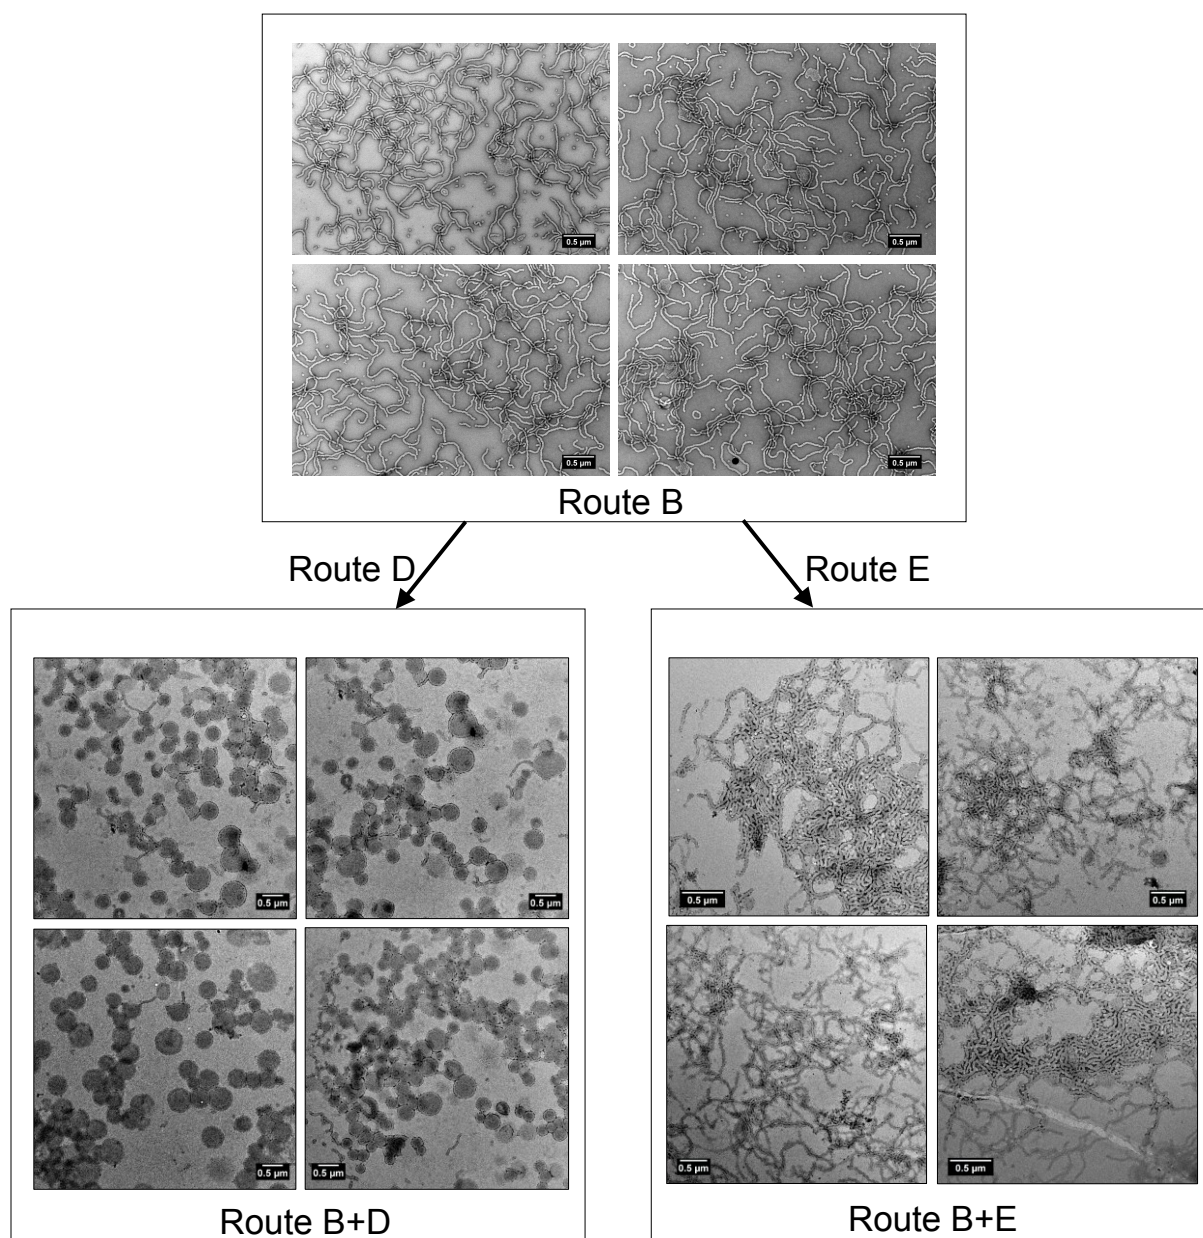

**Figure S41.** Representative TEM images showing morphology change of PEG<sub>113</sub>-*b*-HPMA<sub>300</sub> at 10 wt% obtained by B+D and B+E. Key: Route A = Thermal initiation at 37 °C. Route D = 100% light intensity photoirradiation at 37 °C for 18 h. Route E = incubation at 37 °C for 18 h.

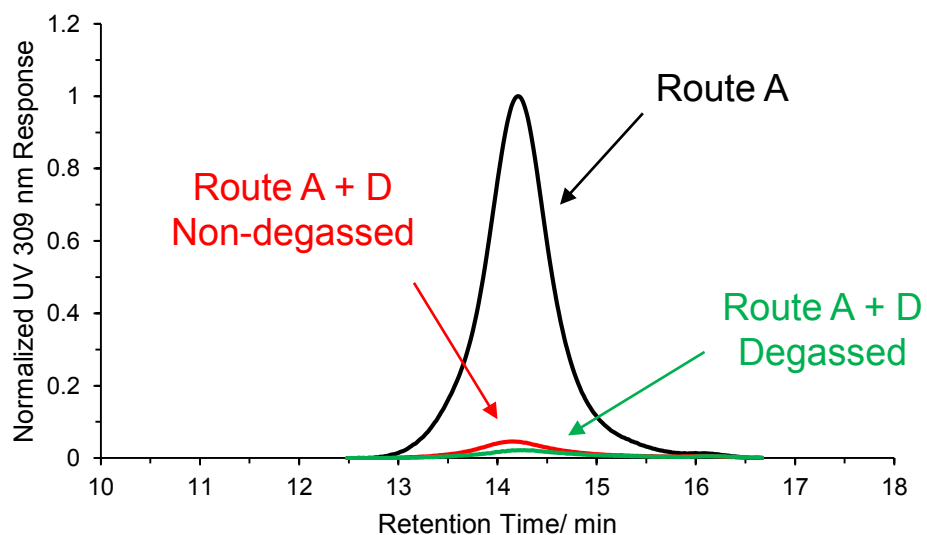

**Figure S42.** Normalized SEC UV traces of PEG<sub>113</sub>-*b*-HPMA<sub>400</sub> formed at 10 wt% HPMA by route A (black) compared with those further irradiated with 100% light intensity for 18 h at 37 °C (route A+D) either with (green) or without (red) degassing the solution prior to irradiation.

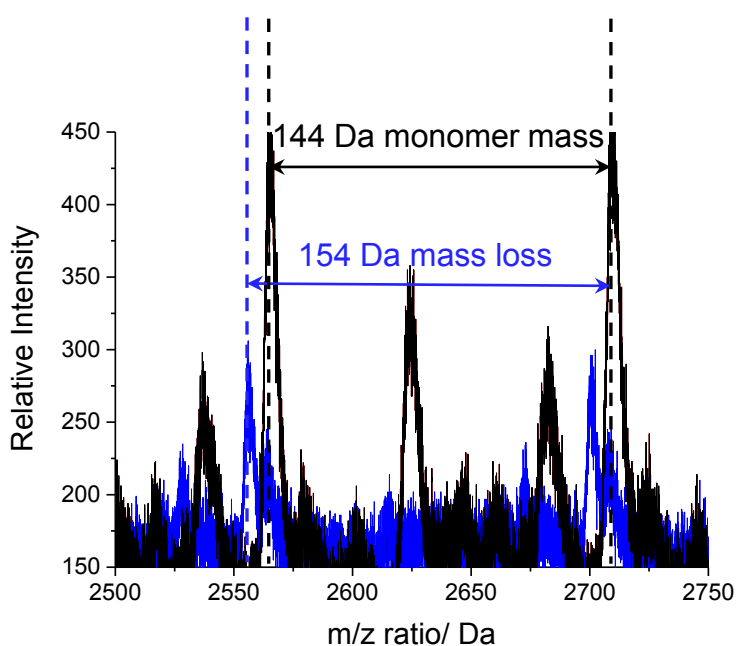

**Figure S43.** MALDI-ToF MS analysis of PHPMA oligomers before (black) and after (blue) irradiation with heat and light at 100% light intensity for 18 h.

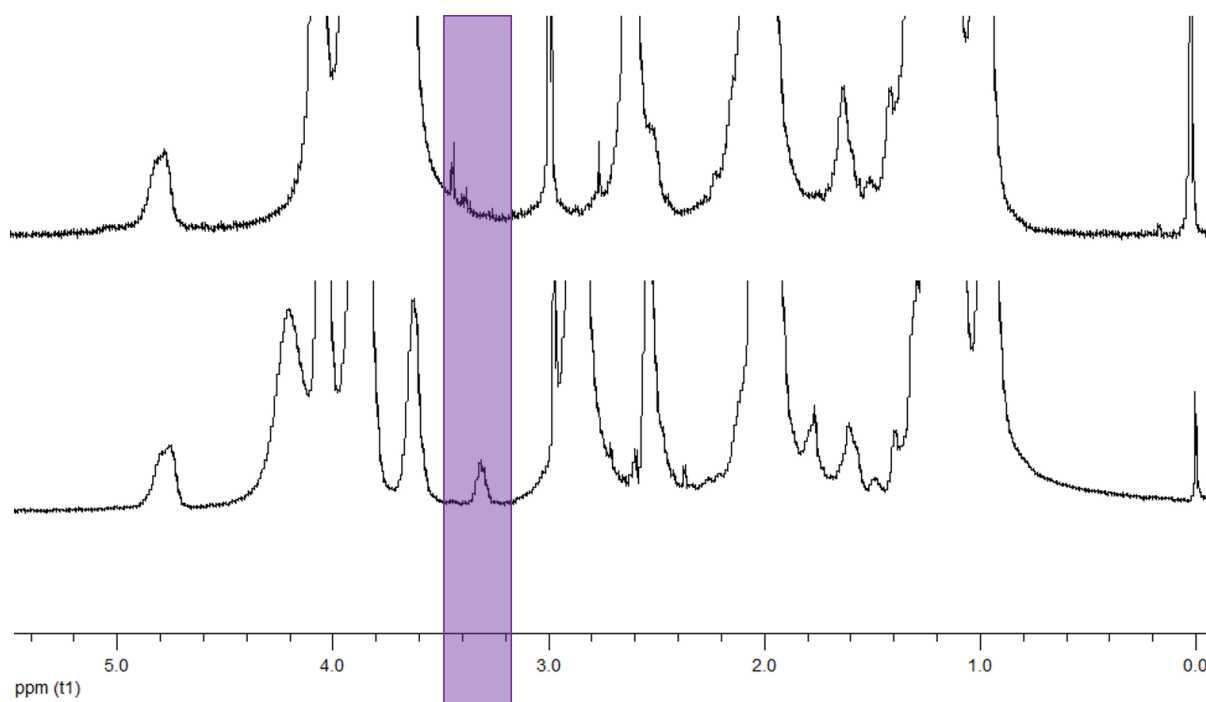

**Figure S44.**  $^1\text{H}$  NMR spectroscopic analysis of PHPMA oligomers at 400 MHz in acetone- $\text{d}_6$  before (bottom) and after (top) irradiation with heat and light at 100% light intensity for 18 h. Removal of the ethylene protons adjacent to the trithiocarbonate end group at 3.31 ppm after irradiation has been highlighted.

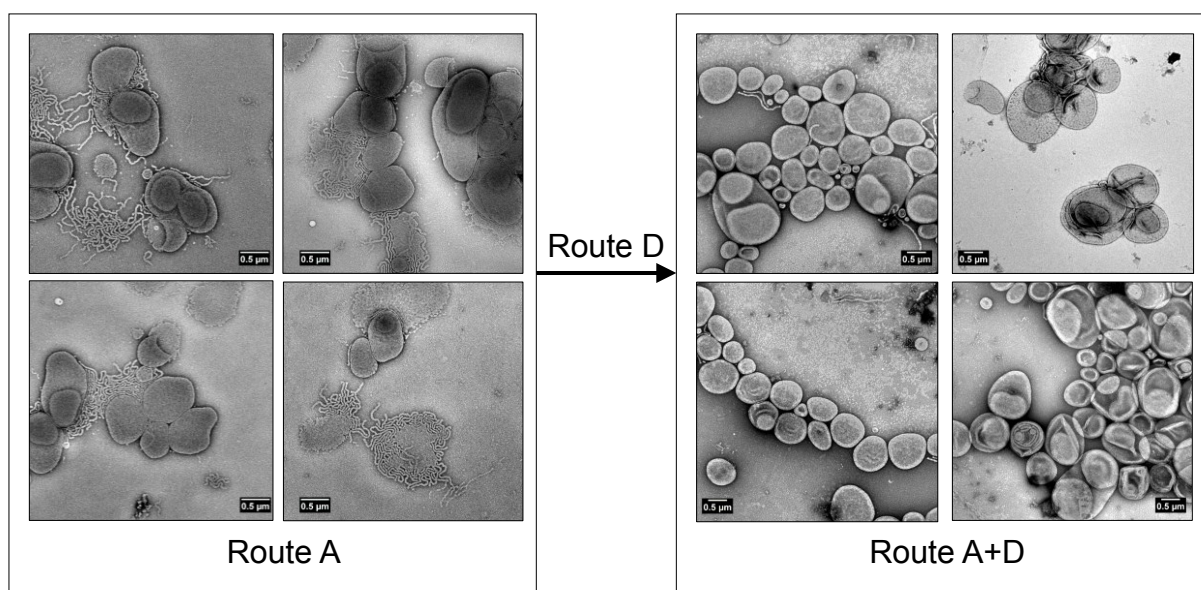

**Figure S45.** Representative TEM images showing morphology change of PEG<sub>113</sub>-*b*-HPMA<sub>300</sub> at 20 wt% obtained by route A and route A+D. Key: Route A = 100% light intensity photoinitiation at 37 °C. Route D = 100% light intensity photoirradiation at 37 °C for 18 h.



**Equilibrium structure of PEG<sub>113</sub>-*b*-HPMA<sub>300</sub> formed by route A+D.**

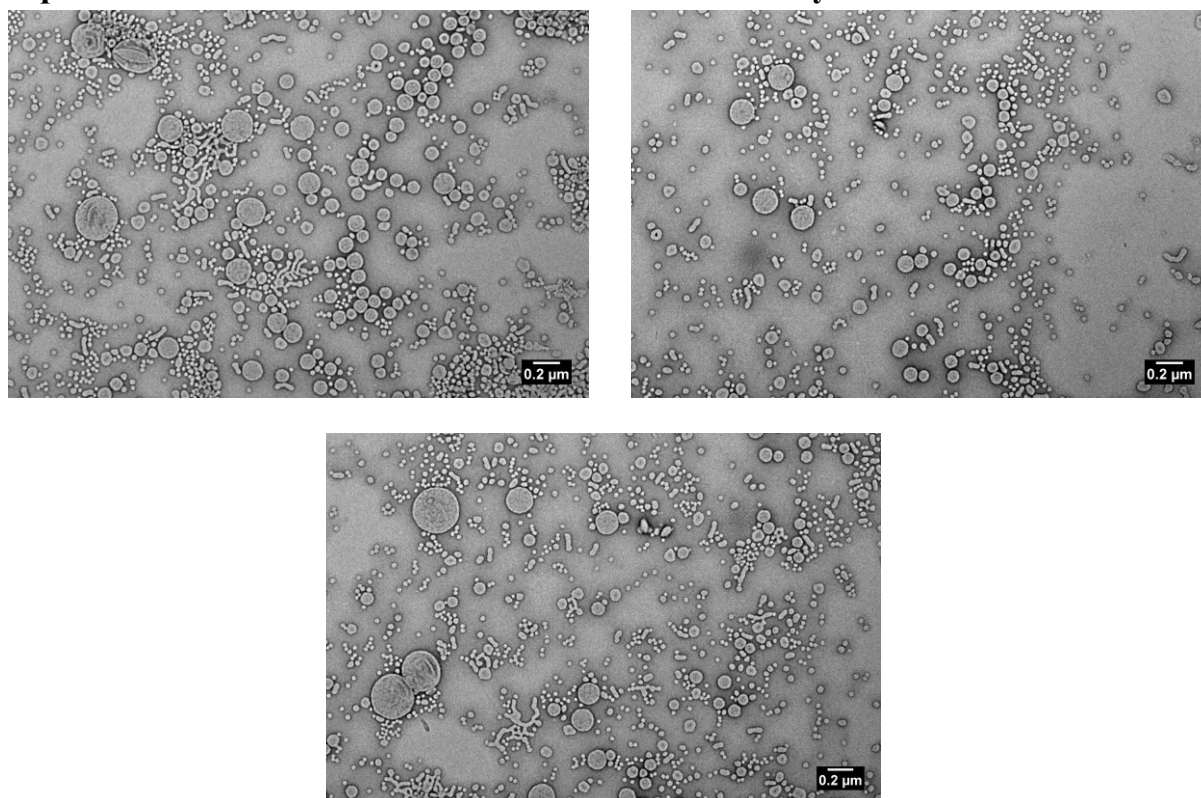

**Figure S46.** Representative TEM images of the new equilibrium structure at 1 mg mL<sup>-1</sup> of PEG<sub>113</sub>-*b*-HPMA<sub>300</sub> obtained by route A+D at 10 wt%.
